# Supplementary material for: HIV-1 integration sites in CD4+ T cells during primary, chronic, and late presentation of HIV-1 infection
Source: PubMed Central journal article supplement (PMC8262285; doi:10.1172/jci.insight.143940), 2021-05-10
Supplement: jciinsight-6-143940-s035.pdf [file jciinsight-6-143940-s035.pdf]

## **SUPPLEMENTAL DATA**

### **HIV-1 integration site features in resting and activated CD4<sup>+</sup> T-cells during primary, chronic, and late presentation of HIV-1 infection**

Yik Lim Kok<sup>1,2\*</sup>, Valentina Vongrad<sup>1,2\*</sup>, Sandra E. Chaudron<sup>1,2</sup>, Mohaned Shilaih<sup>1,2</sup>, Christine Leemann<sup>1,2</sup>, Kathrin Neumann<sup>1,2</sup>, Katharina Kusejko<sup>1,2</sup>, Francesca Di Giallonardo<sup>1,2</sup>, Herbert Kuster<sup>1,2</sup>, Dominique L. Braun<sup>1,2</sup>, Roger D. Kouyos<sup>1,2</sup>, Huldrych F. Günthard<sup>1,2</sup>, and Karin J. Metzner<sup>1,2</sup>

<sup>1</sup> Division of Infectious Diseases and Hospital Epidemiology, University Hospital Zurich, University of Zurich, Zurich, Switzerland

<sup>2</sup> Institute of Medical Virology, University of Zurich, Zurich, Switzerland

\*YLK and VV contributed equally to this work.

## Supplementary figures and tables

**A**

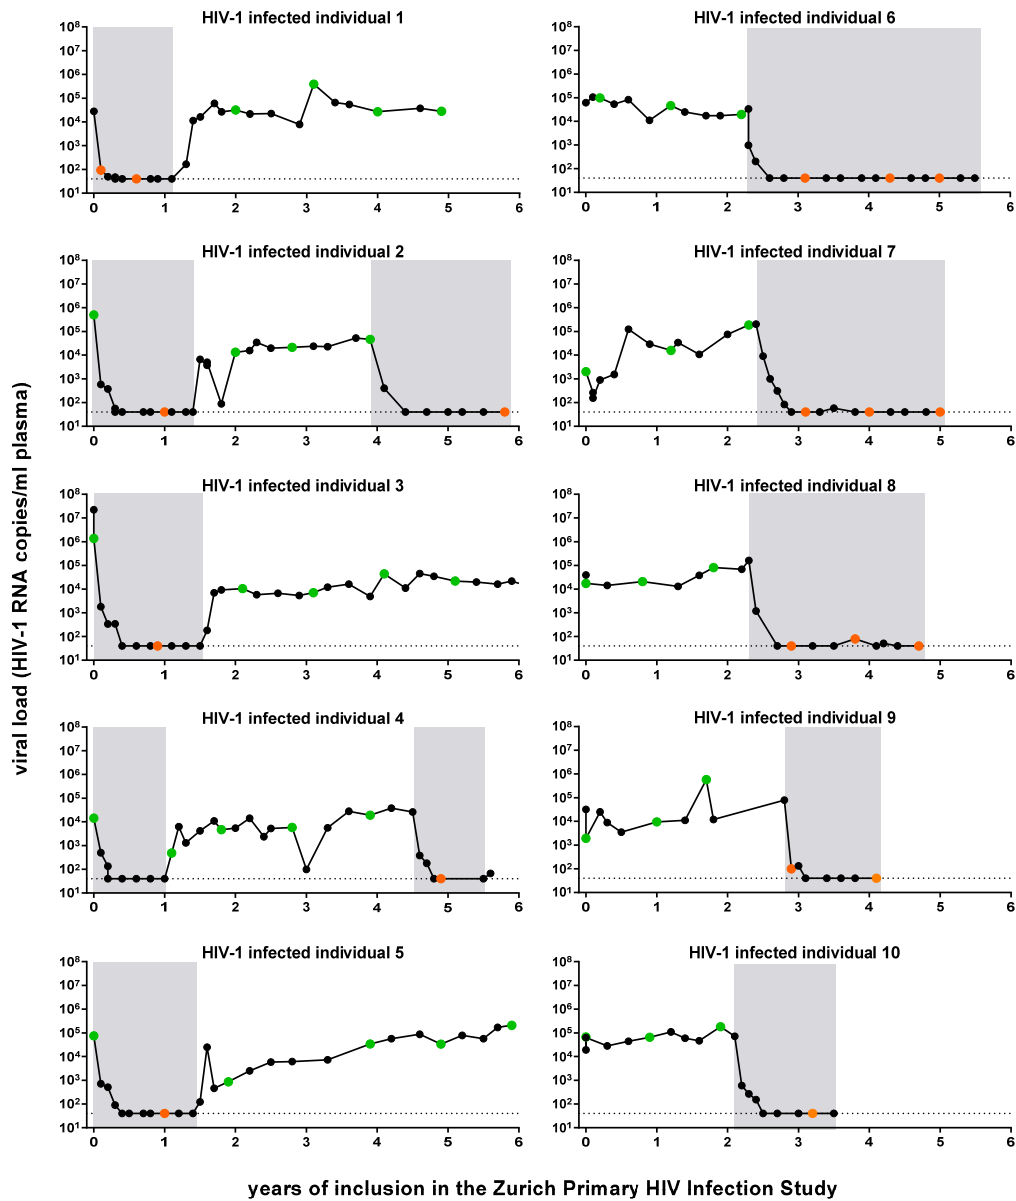

**B**

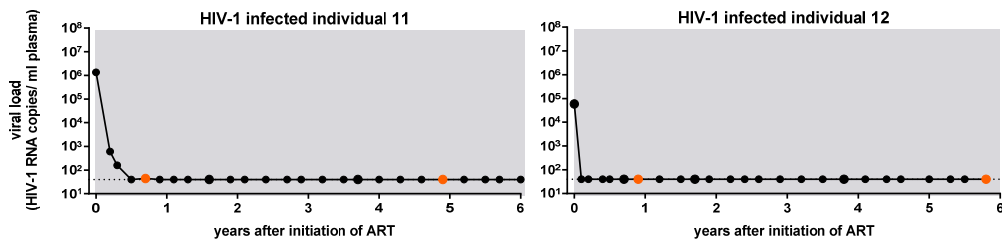

**Figure S1. Characteristics of HIV-1 infected individuals.** Viral load kinetics of HIV-1 infected individuals included during primary/recent HIV-1 infection (**A**) or in the late stage of HIV-1 infection (**B**) are depicted. Areas shaded in gray represent time periods on ART. Orange and green circles represent time points on and off ART, respectively, chosen for HIV-1 integration site analysis.

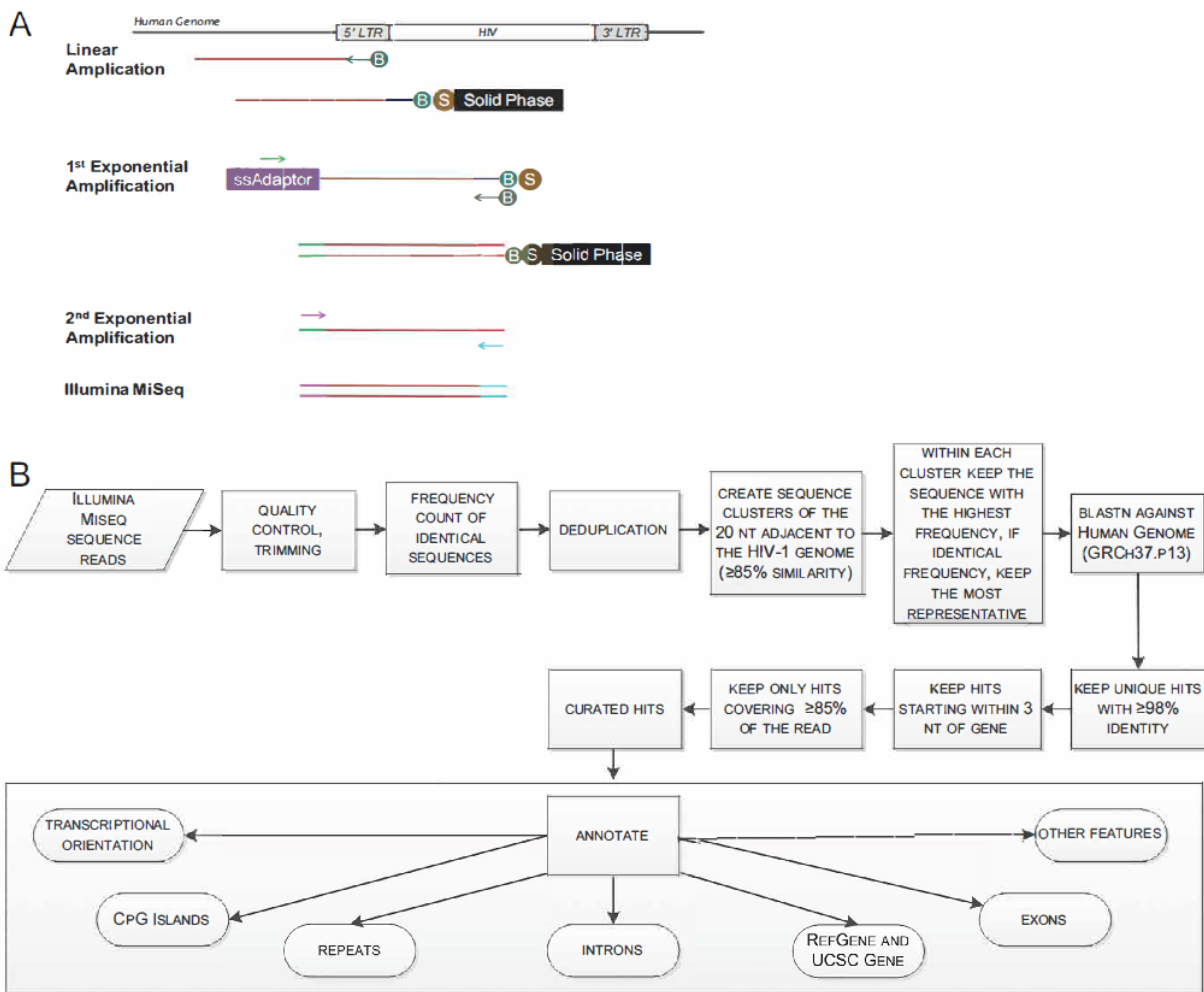

**Figure S2. nrLAM-PCR and the workflow of the Integration Site Analysis Pipeline (InStAP).** **A.** Scheme of nrLAM-PCR for HIV-1 integration site amplification. HIV-1 LTR and genomic junctions were amplified with linear PCR followed by ssDNA adaptor ligation to the 3' end and further genomic junctions were amplified in two rounds of PCRs. Paramagnetic bead capturing was applied after the linear and 1<sup>st</sup> exponential PCR to enrich amplicons. Finally, purified amplification products were prepared for sequencing using the Illumina MiSeq platform. **B.** Workflow of the Integration Site Analysis Pipeline (InStAP). The list of applied UCSC tables based on the 2016 release is given in Table S3.

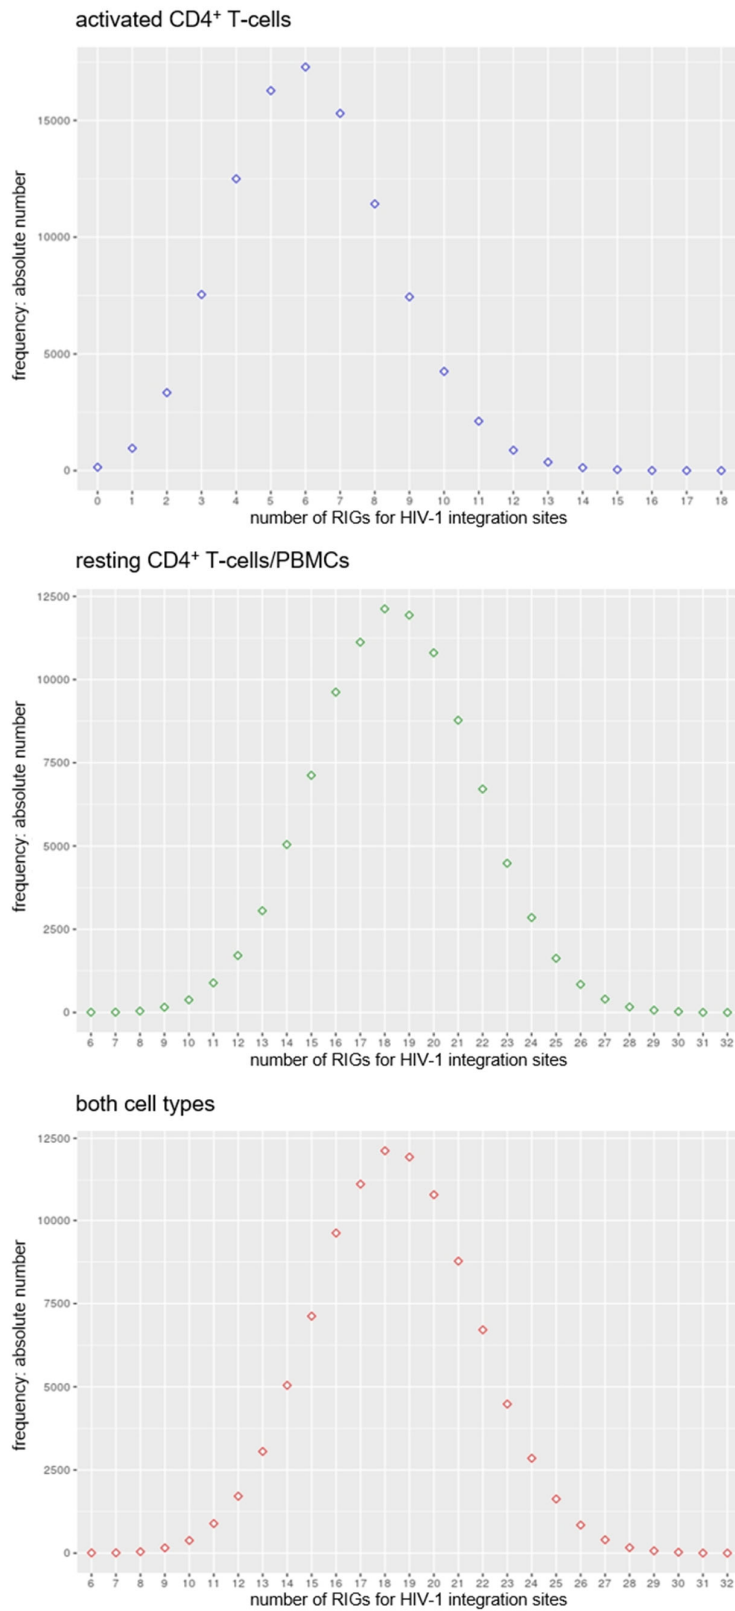

**Figure S3. Simulated distribution of recurrent integration genes (RIGs) in the different cell types.** The occurrence of the 43 RIGs found in the different cell types studied was randomly simulated  $10^5$  times. Compared to the observed data, differences were not significant: activated CD4<sup>+</sup> T-cells,  $p = 0.75$ ; resting CD4<sup>+</sup> T-cells/PBMCs,  $p=0.17$ ; both cell types,  $p=0.81$ .

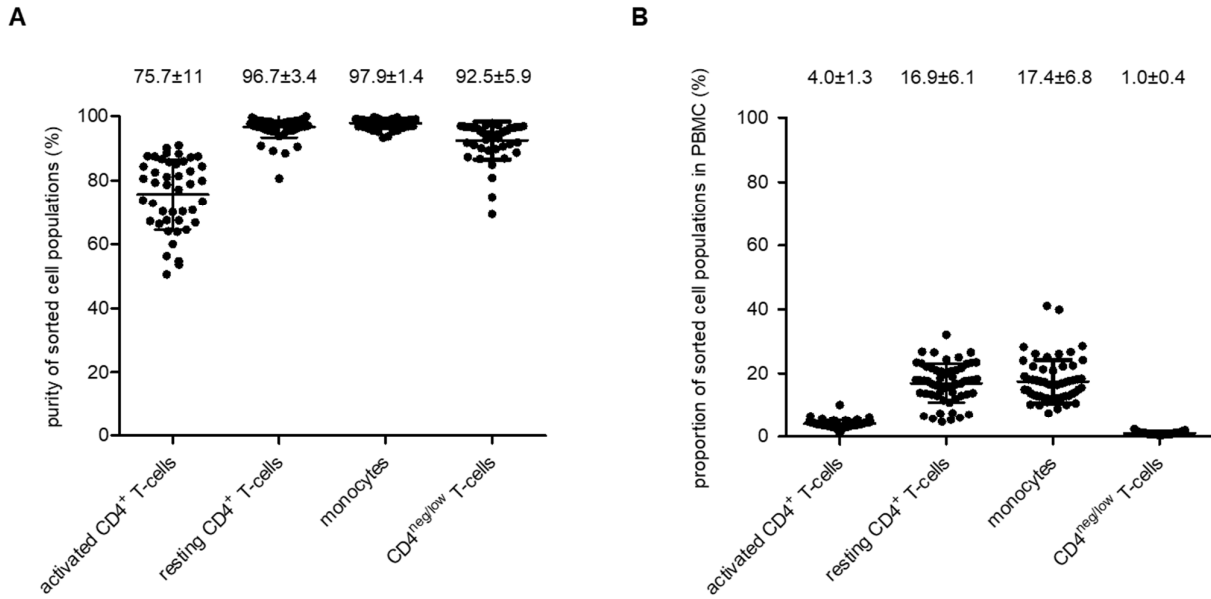

**Figure S4. Characteristics of sorted cell populations from cryopreserved PBMC samples (n = 57) from 10 HIV-1 infected individuals. A.** Purities of cell populations in % after FACS, analyzed by flow cytometry. **B.** Distribution of cell populations in % in HIV-1 infected individuals' PBMCs. Means and standard deviations are shown.

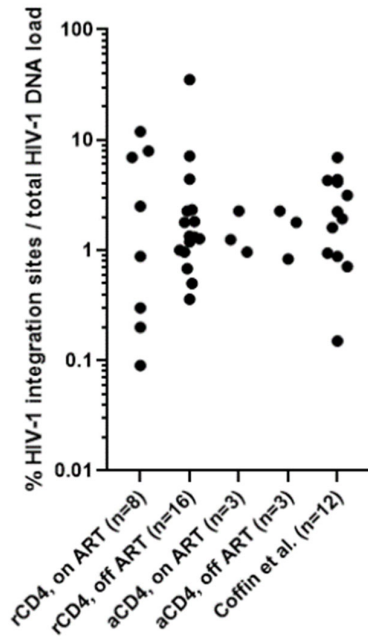

**Figure S5. Proportion of HIV-1 integration sites in resting and activated CD4<sup>+</sup> T-cells in relation to cellular total HIV-1 DNA load.** For comparison, numbers of HIV-1 integration sites and cellular total HIV-1 DNA loads published by J.M. Coffin et al. (1) in supplemental figure 1 were used to calculate the proportions. In our study, HIV-1 integration sites were amplified using nrLAM-PCR. The study by J.M. Coffin et al. applied linker-mediated nested PCR. Differences were statistically not significant as calculated using the two-tailed Fisher's exact test.

**Table S1. Characteristics of HIV-1 infected individuals and numbers of HIV-1 integration sites obtained.**

| HIV-1 infected individual | time point (see figure S1) | clinical stage | HIV-1 RNA copies/ml plasma | CD4 <sup>+</sup> T-cell count/ $\mu$ l blood | ART | HIV-1 integration sites          |                                    |                            |      |
|---------------------------|----------------------------|----------------|----------------------------|----------------------------------------------|-----|----------------------------------|------------------------------------|----------------------------|------|
|                           |                            |                |                            |                                              |     | resting CD4 <sup>+</sup> T-cells | activated CD4 <sup>+</sup> T-cells | CD4 <sup>low</sup> T-cells | PBMC |
| 1                         | 1                          | primary        | 93                         | 648                                          | on  | 6                                | 0                                  |                            |      |
|                           | 2                          | chronic        | <50                        | 532                                          | on  | 3                                | 2                                  |                            |      |
|                           | 3                          | chronic        | 31500                      | 779                                          | off | 0                                | 1                                  |                            |      |
|                           | 4                          | chronic        | 391000                     | 649                                          | off | 2                                | 2                                  |                            |      |
|                           | 5                          | chronic        | 27000                      | 719                                          | off | 3                                | 0                                  |                            |      |
|                           | 6                          | chronic        | 27900                      | 372                                          | off | 1                                | 0                                  |                            |      |
| 2                         | 1                          | primary        | 495500                     | 724                                          | off | 2                                | 0                                  |                            |      |
|                           | 2                          | chronic        | <50                        | 712                                          | on  | 0                                | 1                                  |                            |      |
|                           | 3                          | chronic        | 13200                      | 599                                          | off | 0                                | 0                                  | 1                          |      |
|                           | 4                          | chronic        | 21300                      | 580                                          | off | 0                                |                                    |                            |      |
|                           | 5                          | chronic        | 46100                      | 463                                          | off | 0                                | 1                                  |                            |      |
|                           | 6                          | chronic        | <50                        | 837                                          | on  | 0                                | 0                                  |                            |      |
| 3                         | 1                          | primary        | 10 <sup>6</sup>            |                                              | off | 13                               | 48                                 | 2                          |      |
|                           | 2                          | chronic        | <50                        | 979                                          | on  | 2                                | 1                                  |                            |      |
|                           | 3                          | chronic        | 10400                      | 852                                          | off | 0                                |                                    | 0                          |      |
|                           | 4                          | chronic        | 7050                       | 843                                          | off | 1                                | 0                                  | 0                          |      |
|                           | 5                          | chronic        | 44000                      | 707                                          | off | 5                                |                                    | 0                          |      |
|                           | 6                          | chronic        | 22000                      | 515                                          | off | 12                               |                                    | 0                          |      |
| 4                         | 1                          | primary        | 144000                     |                                              | off | 6                                | 0                                  | 0                          |      |
|                           | 2                          | chronic        | 483                        |                                              | off | 0                                | 0                                  | 0                          |      |
|                           | 3                          | chronic        | 4670                       |                                              | off | 4                                | 1                                  | 0                          |      |
|                           | 4                          | chronic        | 5810                       | 562                                          | off | 3                                |                                    |                            |      |
|                           | 5                          | chronic        | 19000                      | 492                                          | off | 0                                | 2                                  |                            |      |
|                           | 6                          | chronic        | <50                        |                                              | on  | 5                                | 0                                  |                            |      |
| 5                         | 1                          | primary        | 75200                      | 608                                          | off | 10                               | 17                                 |                            |      |
|                           | 2                          | chronic        | <50                        | 951                                          | on  | 5                                | 0                                  |                            |      |
|                           | 3                          | chronic        | 864                        | 870                                          | off | 9                                |                                    |                            |      |
|                           | 4                          | chronic        | 34000                      | 583                                          | off | 5                                | 3                                  |                            |      |
|                           | 5                          | chronic        | 33541                      | 511                                          | off | 6                                | 15                                 |                            |      |
|                           | 6                          | chronic        | 170584                     | 484                                          | off | 49                               | 9                                  | 4                          |      |
| 6                         | 1                          | primary        | 98000                      |                                              | off | 22                               | 4                                  | 1                          |      |
|                           | 2                          | chronic        | 46300                      | 310                                          | off | 25                               | 33                                 | 0                          |      |
|                           | 3                          | chronic        | 19700                      | 237                                          | off | 10                               | 0                                  | 0                          |      |
|                           | 4                          | chronic        | <50                        | 540                                          | on  | 14                               | 8                                  |                            |      |
|                           | 5                          | chronic        | <50                        | 517                                          | on  | 13                               | 0                                  |                            |      |
|                           | 6                          | chronic        | <50                        | 485                                          | on  | 1                                | 3                                  |                            |      |
| 7                         | 1                          | primary        | 261                        |                                              | off | 5                                | 0                                  | 0                          |      |
|                           | 2                          | chronic        | 15700                      | 336                                          | off | 3                                | 1                                  | 0                          |      |
|                           | 3                          | chronic        | 186000                     | 203                                          | off | 3                                | 4                                  | 0                          |      |
|                           | 4                          | chronic        | <50                        |                                              | on  | 33                               | 1                                  |                            |      |
|                           | 5                          | chronic        | <50                        |                                              | on  | 1                                | 3                                  |                            |      |
|                           | 6                          | chronic        | <50                        |                                              | on  | 5                                |                                    |                            |      |
| 8                         | 1                          | primary        | 17400                      | 848                                          | off | 2                                | 0                                  | 0                          |      |
|                           | 2                          | chronic        | 20800                      | 945                                          | off | 10                               |                                    | 0                          |      |
|                           | 3                          | chronic        | 81000                      | 614                                          | off | 5                                | 6                                  | 0                          |      |
|                           | 4                          | chronic        | <50                        | 742                                          | on  | 7                                |                                    |                            |      |
|                           | 5                          | chronic        | 79                         | 877                                          | on  | 2                                |                                    |                            |      |
|                           | 6                          | chronic        | <50                        | 767                                          | on  | 10                               | 1                                  |                            |      |
| 9                         | 1                          | primary        | 1930                       | 723                                          | off | 2                                | 0                                  | 0                          |      |
|                           | 2                          | chronic        | 9500                       | 542                                          | off | 0                                | 0                                  | 0                          |      |
|                           | 3                          | chronic        | 580000                     | 379                                          | off | 0                                | 0                                  |                            |      |
|                           | 4                          | chronic        | 100                        | 456                                          | on  | 1                                | 0                                  |                            |      |
|                           | 5                          | chronic        | <50                        | 579                                          | on  | 5                                | 0                                  |                            |      |
| 10                        | 1                          | primary        | 63500                      | 537                                          | off | 8                                | 1                                  |                            |      |
|                           | 2                          | chronic        | 65000                      | 537                                          | off | 1                                | 2                                  |                            |      |
|                           | 3                          | chronic        | 181462                     | 388                                          | off | 16                               | 3                                  |                            |      |
|                           | 4                          | chronic        | <50                        | 905                                          | on  | 1                                | 0                                  |                            |      |
| 11                        | 1                          | late           | <50                        | 165                                          | on  |                                  |                                    |                            | 15   |
|                           | 5                          | late           | <50                        | 476                                          | on  |                                  |                                    |                            | 25   |
| 12                        | 1                          | late           | <50                        | 133                                          | on  |                                  |                                    |                            | 10   |
|                           | 5                          | late           | <50                        | 352                                          | on  |                                  |                                    |                            | 1    |

**Table S2. 589 unique HIV-1 integration sites derived from 12 HIV-1 infected individuals.**

Please see extra file



**Table S3. Recurrent integration genes (RIGs).** List of 43 genes in which HIV-1 provirus was independently detected at least 2 times.

| RefGene name | chromosome | HIV-1 infected individual | time point (see figure S1) | stage of HIV-1 infection | ART (on, off) | activated, resting CD4 <sup>+</sup> T-cells, PBMC | intron/exon/UTR (x/total)                    | transcriptional orientation |
|--------------|------------|---------------------------|----------------------------|--------------------------|---------------|---------------------------------------------------|----------------------------------------------|-----------------------------|
| ACSF3        | 16         | 4                         | 6                          | CHI                      | on            | rCD4                                              | intron 7/10, 6/9, 5/8                        | convergent                  |
| ACSF3        |            | 6                         | 2                          | CHI                      | off           | aCD4                                              | intron 7/10, 6/9, 5/8                        | convergent                  |
| AKAP13       | 15         | 5                         | 1                          | PHI                      | off           | rCD4                                              | intron 1/36                                  | convergent                  |
| AKAP13       |            | 7                         | 4                          | CHI                      | on            | rCD4                                              | exon 13/37, 5/29                             | convergent                  |
| ANKRD11      | 16         | 8                         | 2                          | CHI                      | off           | rCD4                                              | intron 1/12, 1/13, 1/9                       | convergent                  |
| ANKRD11      |            | 10                        | 1                          | PHI                      | off           | aCD4                                              | intron 1/12, 1/13, 1/9, 1/2                  | undetermined                |
| ARIH2        | 3          | 3                         | 1                          | PHI                      | off           | aCD4                                              | intron 3/15                                  | convergent                  |
| ARIH2        |            | 3                         | 1                          | PHI                      | off           | aCD4                                              | intron 2/15                                  | same                        |
| BACH2        | 6          | 1                         | 1                          | PHI                      | on            | rCD4                                              | intron 5/8, 3/6                              | same                        |
| BACH2        |            | 4                         | 4                          | CHI                      | off           | rCD4                                              | intron 5/8, 3/6                              | same                        |
| BACH2        |            | 6                         | 4                          | CHI                      | on            | rCD4                                              | intron 5/8, 3/6                              | same                        |
| BACH2        |            | 6                         | 4                          | CHI                      | on            | rCD4                                              | intron 5/8, 3/6                              | same                        |
| BACH2        |            | 10                        | 3                          | CHI                      | off           | rCD4                                              | intron 5/8, 3/6                              | same                        |
| BACH2        |            | 11                        | 2                          | late presenter           | on            | PBMC                                              | intron 4/8, 2/6                              | convergent                  |
| CAND1        | 12         | 5                         | 5                          | CHI                      | off           | aCD4                                              | intron 1/14                                  | convergent                  |
| CAND1        |            | 7                         | 5                          | CHI                      | on            | aCD4                                              | intron 3/14                                  | same                        |
| CD44         | 11         | 8                         | 2                          | CHI                      | off           | rCD4                                              | intron 2/3, 5/8, 5/7, 5/9, 9/16, 5/11, 10/17 | convergent                  |
| CD44         |            | 12                        | 1                          | late presenter           | on            | PBMC                                              | intron 2/3, 5/8, 5/7, 5/9, 5/16, 5/11, 5/17  | same                        |
| CEACAM21     | 19         | 3                         | 1                          | PHI                      | off           | aCD4                                              | intron 1/7                                   | same                        |
| CEACAM21     |            | 6                         | 2                          | CHI                      | off           | aCD4                                              | intron 1/7                                   | same                        |
| COX10        | 17         | 7                         | 4                          | CHI                      | on            | rCD4                                              | intron 4/6                                   | same                        |
| COX10        |            | 11                        | 2                          | late presenter           | on            | PBMC                                              | intron 4/6                                   | same                        |
| CSNK1E       | 22         | 5                         | 6                          | CHI                      | off           | rCD4                                              | intron 1/14, 1/4                             | convergent                  |
| CSNK1E       |            | 6                         | 2                          | CHI                      | off           | aCD4                                              | intron 1/14, 1/4                             | convergent                  |
| CYTH1        | 17         | 5                         | 6                          | CHI                      | off           | rCD4                                              | intron 1/12                                  | convergent                  |
| CYTH1        |            | 11                        | 2                          | late presenter           | on            | PBMC                                              | intron 1/12                                  | same                        |
| DNAJC5       | 20         | 6                         | 1                          | PHI                      | off           | rCD4                                              | intron 1/4                                   | same                        |
| DNAJC5       |            | 11                        | 2                          | late presenter           | on            | PBMC                                              | intron 1/4                                   | same                        |
| DNMT1        | 19         | 5                         | 1                          | PHI                      | off           | rCD4                                              | intron 19/40, 18/39                          | convergent                  |
| DNMT1        |            | 12                        | 1                          | late presenter           | on            | PBMC                                              | intron 5/40, 4/39                            | same                        |
| EIF4G3       | 1          | 6                         | 2                          | CHI                      | off           | aCD4                                              | intron 5/34, 3/31, 8/14                      | same                        |
| EIF4G3       |            | 7                         | 1                          | PHI                      | off           | rCD4                                              | intron 3/34, 1/31, 5/14                      | convergent                  |
| FOXK2        | 17         | 3                         | 1                          | PHI                      | off           | aCD4                                              | intron 8/8                                   | convergent                  |
| FOXK2        |            | 10                        | 3                          | CHI                      | off           | rCD4                                              | intron 2/8                                   | same                        |
| GNB1         | 1          | 2                         | 1                          | PHI                      | off           | rCD4                                              | intron 2/11                                  | same                        |
| GNB1         |            | 7                         | 4                          | CHI                      | on            | rCD4                                              | intron 1/11                                  | convergent                  |
| HN1L         | 16         | 5                         | 6                          | CHI                      | off           | rCD4                                              | intron 2/4                                   | same                        |
| HN1L         |            | 6                         | 2                          | CHI                      | off           | aCD4                                              | intron 2/4                                   | same                        |
| HN1L         |            | 10                        | 3                          | CHI                      | off           | rCD4                                              | intron 2/4                                   | convergent                  |
| ITPKB        | 1          | 5                         | 3                          | CHI                      | off           | rCD4                                              | intron 2/7                                   | convergent                  |
| ITPKB        |            | 3                         | 1                          | PHI                      | off           | rCD4                                              | Intron 2/7, 1/1                              | convergent                  |
| KANSL1       | 17         | 3                         | 1                          | PHI                      | off           | aCD4                                              | intron 1/15                                  | convergent                  |
| KANSL1       |            | 3                         | 1                          | PHI                      | off           | rCD4                                              | intron 2/14, 3/15, 2/14                      | same                        |
| KANSL1       |            | 7                         | 4                          | CHI                      | on            | rCD4                                              | intron 3/14, 4/15, 3/14                      | convergent                  |
| KIAA1432     | 9          | 2                         | 2                          | CHI                      | on            | aCD4                                              | intron 8/24, 8/25, 8/2                       | same                        |
| KIAA1432     |            | 6                         | 5                          | CHI                      | on            | rCD4                                              | intron 3/24, 3/25, 3/21                      | same                        |
| KPNB1        | 17         | 5                         | 6                          | CHI                      | off           | rCD4                                              | intron 9/21, 8/20                            | same                        |
| KPNB1        |            | 6                         | 2                          | CHI                      | off           | aCD4                                              | intron 9/21, 8/20                            | convergent                  |
| LASP1        | 17         | 11                        | 2                          | late presenter           | on            | PBMC                                              | intron 2/5, 2/6, 2/7                         | convergent                  |
| LASP1        |            | 11                        | 2                          | late presenter           | on            | PBMC                                              | intron 2/5, 2/6, 2/7                         | same                        |
| LPIN2        | 18         | 1                         | 1                          | PHI                      | on            | rCD4                                              | intron 4/19, Exon 1/1                        | convergent                  |
| LPIN2        |            | 4                         | 5                          | CHI                      | off           | aCD4                                              | intron 4/19, Exon 1/1                        | convergent                  |
| MKL1         | 22         | 3                         | 1                          | PHI                      | off           | aCD4                                              | intron 4/14, 4/13, 1/11                      | same                        |

|        |    |    |   |                |     |      |                                           |              |
|--------|----|----|---|----------------|-----|------|-------------------------------------------|--------------|
| MKL1   |    | 5  | 1 | PHI            | off | aCD4 | intron 3/14, 3/13                         | same         |
| MKL2   | 16 | 3  | 6 | CHI            | off | rCD4 | intron 6/16                               | same         |
| MKL2   |    | 5  | 3 | CHI            | off | rCD4 | intron 6/16                               | same         |
| MKL2   |    | 5  | 4 | CHI            | off | rCD4 | intron 6/16                               | same         |
| MKL2   |    | 5  | 5 | CHI            | off | aCD4 | intron 6/16                               | same         |
| MKL2   |    | 7  | 2 | CHI            | off | rCD4 | intron 3/16                               | convergent   |
| MROH1  | 8  | 3  | 1 | PHI            | off | aCD4 | intron 4/12, 4/43, 3/11, 3/41             | convergent   |
| MROH1  |    | 5  | 1 | PHI            | off | rCD4 | intron 14/43, 13/41                       | convergent   |
| PACS1  | 11 | 1  | 5 | CHI            | off | rCD4 | intron 1/23                               | convergent   |
| PACS1  |    | 6  | 4 | CHI            | on  | rCD4 | intron 1/23                               | convergent   |
| PACS1  |    | 8  | 3 | CHI            | off | aCD4 | intron 1/23                               | convergent   |
| PACS1  |    | 9  |   | CHI            | on  | rCD4 | intron 1/23                               | convergent   |
| PIEZO1 | 16 | 5  | 6 | CHI            | off | aCD4 | exon 41/53                                | convergent   |
| PIEZO1 |    | 7  | 6 | CHI            | on  | rCD4 | intron 2/50, exon 3/3                     | undetermined |
| PPP6R2 | 22 | 3  | 1 | PHI            | off | aCD4 | intron 2/22, 2/23                         | same         |
| PPP6R2 |    | 11 | 2 | late presenter | on  | PBMC | intron 2/22, 2/23                         | same         |
| PRMT2  | 21 | 4  | 6 | CHI            | on  | rCD4 | intron 3/11, 2/10, 2/6, 2/8, 2/7          | convergent   |
| PRMT2  |    | 9  |   | CHI            | on  | rCD4 | intron 3/11, 2/10, 2/6, 2/8, 2/7          | convergent   |
| PRPF6  | 20 | 6  | 2 | CHI            | off | rCD4 | intron 12/20                              | convergent   |
| PRPF6  |    | 8  | 2 | CHI            | off | rCD4 | intron 4/20                               | convergent   |
| PRPF6  |    | 11 | 2 | late presenter | on  | PBMC | intron 6/20                               | convergent   |
| RASA2  | 3  | 7  | 4 | CHI            | on  | rCD4 | intron 19/23, 19/24                       | convergent   |
| RASA2  |    | 8  | 6 | CHI            | on  | rCD4 | intron 4/23, 4/24                         | convergent   |
| RBL1   | 20 | 3  | 1 | PHI            | off | aCD4 | exon 22/22                                | convergent   |
| RBL1   |    | 5  | 6 | CHI            | off | rCD4 | intron 11/21, 11/20                       | convergent   |
| RBM6   | 3  | 5  | 1 | PHI            | off | aCD4 | intron 2/16, 5/20                         | convergent   |
| RBM6   |    | 5  | 6 | CHI            | off | rCD4 | intron 2/16, 5/20                         | convergent   |
| RNF157 | 17 | 6  | 2 | CHI            | off | aCD4 | intron 5/18                               | same         |
| RNF157 |    | 11 | 2 | late presenter | on  | PBMC | intron 1/18                               | same         |
| SCAPER | 15 | 5  | 1 | PHI            | off | aCD4 | intron 14/30, 15/31                       | same         |
| SCAPER |    | 6  | 3 | CHI            | off | rCD4 | intron 7/30, 8/31                         | same         |
| SEMA4D | 9  | 7  | 5 | CHI            | on  | aCD4 | intron 1/20, 1/17                         | convergent   |
| SEMA4D |    | 8  | 5 | CHI            | on  | rCD4 | intron 4/20, 4/17                         | convergent   |
| SMG6   | 17 | 2  | 3 | CHI            | off | aCD4 | intron 10/18, 2/10, 3/11                  | same         |
| SMG6   |    | 5  | 6 | CHI            | off | aCD4 | intron 13/18, 5/10, 6/11                  | same         |
| SPTAN1 | 9  | 7  | 4 | CHI            | on  | rCD4 | overlapping gene 2/2, 38/56, 37/55, 36/54 | same         |
| SPTAN1 |    | 11 | 2 | late presenter | on  | PBMC | overlapping gene 2/2, 22/56, 22/55, 22/54 | convergent   |
| VPS29  | 12 | 5  | 5 | CHI            | off | aCD4 | intron 3/4, 2/3, 2/2, 4/5, 3/4            | convergent   |
| VPS29  |    | 11 | 2 | late presenter | on  | PBMC | intron 3/4, 2/3, 2/2, 4/5, 3/4            | convergent   |
| XPO6   | 16 | 3  | 1 | PHI            | off | rCD4 | intron 5/24, 4/23                         | same         |
| XPO6   |    | 9  | 1 | PHI            | off | rCD4 | intron 7/24, 6/23                         | same         |
| ZBED4  | 22 | 6  | 2 | CHI            | off | aCD4 | intron 1/1                                | convergent   |
| ZBED4  |    | 10 | 3 | CHI            | off | rCD4 | 5'UTR                                     | same         |
| ZC3H3  | 8  | 6  | 5 | CHI            | on  | rCD4 | intron 9/11                               | same         |
| ZC3H3  |    | 12 | 1 | late presenter | on  | PBMC | intron 3/11                               | convergent   |

CHI, chronic HIV-1 infection; PHI, primary HIV-1 infection

multiple intron numbers are due to splice variants

**Table S4. List of applied UCSC tables based on the 2016 release (2)**

---

1,"3utr\_ucsc\_exons.tab"  
2,"3utr\_ucsc\_exons.tabGR"  
3,"5utr\_ucsc\_exons.tab"  
4,"5utr\_ucsc\_exons.tabGR"  
5,"CGAP\_SAGE.tab"  
6,"CGAP\_SAGE.tabGR"  
7,"SGTSS.txt"  
8,"SGTSS.txtGR"  
9,"all\_mRNA\_cln.tab"  
10,"all\_mRNA\_cln.tabGR"  
11,"all\_ucsc\_exons.tab"  
12,"all\_ucsc\_exons.tabGR"  
13,"cancergenes.tab"  
14,"cancergenes.tabGR"  
15,"cpgIDensity1000"  
16,"cpgIDensity1000GR"  
17,"cpgIDensity10000"  
18,"cpgIDensity10000GR"  
19,"cpgIDensity100000"  
20,"cpgIDensity100000GR"  
21,"cpgIDensity1000000"  
22,"cpgIDensity1000000GR"  
23,"cpgIDensity10000000"  
24,"cpgIDensity10000000GR"  
25,"cpgIDensity100000000"  
26,"cpgIDensity100000000GR"  
27,"cpgIDensity5000"  
28,"cpgIDensity5000GR"  
29,"cpgIDensity50000"  
30,"cpgIDensity50000GR"  
31,"cpgislandsext\_cln.tab"  
32,"cpgislandsext\_cln.tabGR"  
33,"gc500Base.tab"  
34,"gc500Base.tabGR"  
35,"geneBounds.tab"  
36,"geneBounds.tabGR"  
37,"lincRNA.tab"  
38,"lincRNA.tabGR"  
39,"lincRNA\_WBC.tab"  
40,"lincRNA\_WBC.tabGR"  
41,"refGDensity\_1000"  
42,"refGDensity\_1000GR"  
43,"refGDensity\_10000"  
44,"refGDensity\_10000GR"  
45,"refGDensity\_100000"  
46,"refGDensity\_100000GR"  
47,"refGDensity\_1000000"  
48,"refGDensity\_1000000GR"  
49,"refGDensity\_10000000"  
50,"refGDensity\_10000000GR"  
51,"refGDensity\_100000000"  
52,"refGDensity\_100000000GR"  
53,"refGDensity\_5000"  
54,"refGDensity\_5000GR"  
55,"refGDensity\_50000"  
56,"refGDensity\_50000GR"  
57,"refSeq\_introns\_cln.tab"  
58,"refSeq\_introns\_cln.tabGR"  
59,"repDensity\_1000"  
60,"repDensity\_1000GR"  
61,"repDensity\_10000"  
62,"repDensity\_10000GR"  
63,"repDensity\_100000"  
64,"repDensity\_100000GR"  
65,"repDensity\_1000000"  
66,"repDensity\_1000000GR"  
67,"repDensity\_10000000"  
68,"repDensity\_10000000GR"  
69,"repDensity\_100000000"  
70,"repDensity\_100000000GR"  
71,"repDensity\_5000"  
72,"repDensity\_5000GR"  
73,"repDensity\_50000"  
74,"repDensity\_50000GR"

---

---

75,"repeatMask.tab"  
76,"repeatMask.tabGR"  
77,"rfsqg\_mrna.tab"  
78,"rfsqg\_mrna.tabGR"  
79,"sno\_miRNA.tab"  
80,"sno\_miRNA.tabGR"  
81,"tfbsConsSites.txt"  
82,"tfbsConsSites.txtGR"  
83,"ucsc.tab"  
84,"ucsc.tabGR"  
85,"ucsc\_coding\_exons.tab"  
86,"ucsc\_coding\_exons.tabGR"  
87,"wgEncodeRegTfbsClusteredV3.txt"  
88,"wgEncodeRegTfbsClusteredV3.txtGR"

---

## References

1. Coffin JM, et al. Clones of infected cells arise early in HIV-infected individuals. *JCI Insight*. 2019;4(12).
2. Speir ML, et al. The UCSC Genome Browser database: 2016 update. *Nucleic Acids Res*. 2016;44(D1):D717-725.
