# Supplementary material for: HIV-1 integration sites in CD4+ T cells during primary, chronic, and late presentation of HIV-1 infection
Source: PubMed Central journal article supplement (PMC8262285; doi:10.1172/jci.insight.143940), 2021-05-10
Supplement: jciinsight-6-143940-s036.pdf [file jciinsight-6-143940-s036.pdf]

**Table S2. 589 unique HIV-1 integration sites derived from 12 HIV-1 infected individuals**

| patient ID | time point (see figure S1) | ART (on, off) | stage of HIV-1 infection | cell type              | amplicon start | amplicon end | chromosome | strand | refGene name | transcriptional orientation |
|------------|----------------------------|---------------|--------------------------|------------------------|----------------|--------------|------------|--------|--------------|-----------------------------|
| 1          | 1                          | on            | primary                  | resting CD4+ T-cells   | 31799700       | 31799742     | 6          | -      |              |                             |
| 1          | 1                          | on            | primary                  | resting CD4+ T-cells   | 49959482       | 49959640     | 19         | -      | ALDH16A1     | convergent                  |
| 1          | 1                          | on            | primary                  | resting CD4+ T-cells   | 90738428       | 90738489     | 6          | -      | BACH2        | same                        |
| 1          | 1                          | on            | primary                  | resting CD4+ T-cells   | 2943211        | 2943377      | 18         | +      | LPIN2        | convergent                  |
| 1          | 1                          | on            | primary                  | resting CD4+ T-cells   | 21850083       | 21850111     | 10         | -      | MLLT10       | convergent                  |
| 1          | 1                          | on            | primary                  | resting CD4+ T-cells   | 38705895       | 38706035     | 8          | -      | TACC1        | convergent                  |
| 1          | 2                          | on            | chronic                  | activated CD4+ T-cells | 129082777      | 129082856    | 9          | -      |              |                             |
| 1          | 2                          | on            | chronic                  | resting CD4+ T-cells   | 79941606       | 79941659     | 17         | -      | ASPSCR1      | convergent                  |
| 1          | 2                          | on            | chronic                  | resting CD4+ T-cells   | 18581736       | 18581872     | 19         | +      | ELL          | convergent                  |
| 1          | 2                          | on            | chronic                  | activated CD4+ T-cells | 14081336       | 14081359     | 19         | -      | RFX1         | same                        |
| 1          | 2                          | on            | chronic                  | resting CD4+ T-cells   | 121849095      | 121849146    | 12         | -      | RNF34        | convergent                  |
| 1          | 3                          | off           | chronic                  | activated CD4+ T-cells | 32625513       | 32625573     | 6          | -      |              |                             |
| 1          | 4                          | off           | chronic                  | resting CD4+ T-cells   | 41598686       | 41598764     | 15         | +      |              |                             |
| 1          | 4                          | off           | chronic                  | activated CD4+ T-cells | 136589769      | 136589819    | 6          | +      | BCLAF1       | convergent                  |
| 1          | 4                          | off           | chronic                  | activated CD4+ T-cells | 62585658       | 62585701     | 11         | +      | STX5         | convergent                  |
| 1          | 4                          | off           | chronic                  | resting CD4+ T-cells   | 12733567       | 12733662     | 19         | -      | ZNF791       | convergent                  |
| 1          | 5                          | off           | chronic                  | resting CD4+ T-cells   | 65871105       | 65871390     | 11         | -      | PACS1        | convergent                  |
| 1          | 5                          | off           | chronic                  | resting CD4+ T-cells   | 36913476       | 36913534     | 17         | +      | PSMB3        | same                        |
| 1          | 5                          | off           | chronic                  | resting CD4+ T-cells   | 61462861       | 61462952     | 2          | +      | USP34        | convergent                  |
| 1          | 6                          | off           | chronic                  | resting CD4+ T-cells   | 37874162       | 37874201     | 10         | -      |              |                             |
| 2          | 1                          | off           | primary                  | resting CD4+ T-cells   | 1758024        | 1758125      | 1          | -      | GNB1         | same                        |
| 2          | 1                          | off           | primary                  | resting CD4+ T-cells   | 57054033       | 57054107     | 19         | -      | ZFP28        | convergent                  |
| 2          | 2                          | on            | chronic                  | activated CD4+ T-cells | 5740498        | 5740860      | 9          | +      | KIAA1432     | same                        |
| 2          | 3                          | off           | chronic                  | activated CD4+ T-cells | 2092602        | 2092708      | 17         | -      | SMG6         | same                        |
| 2          | 4                          | off           | chronic                  | activated CD4+ T-cells | 76205483       | 76205543     | 11         | +      | C11orf30     | same                        |
| 3          | 1                          | off           | primary                  | activated CD4+ T-cells | 3135077        | 3135156      | 19         | -      |              |                             |
| 3          | 1                          | off           | primary                  | activated CD4+ T-cells | 145322526      | 145322546    | 7          | +      |              |                             |
| 3          | 1                          | off           | primary                  | activated CD4+ T-cells | 48828239       | 48828317     | 19         | -      |              |                             |
| 3          | 1                          | off           | primary                  | activated CD4+ T-cells | 57385026       | 57385046     | 16         | +      |              |                             |
| 3          | 1                          | off           | primary                  | resting CD4+ T-cells   | 10094945       | 10094967     | 21         | +      |              |                             |
| 3          | 1                          | off           | primary                  | resting CD4+ T-cells   | 55976151       | 55976229     | 5          | +      |              |                             |
| 3          | 1                          | off           | primary                  | activated CD4+ T-cells | 417230         | 417325       | 16         | -      |              |                             |
| 3          | 1                          | off           | primary                  | activated CD4+ T-cells | 165818421      | 165818441    | 2          | +      |              |                             |

| patient ID | time point      | ART (on, off) | stage of        | cell type              | amplicon start | amplicon end | chromosome | strand | refGene name   | transcriptional orientation |
|------------|-----------------|---------------|-----------------|------------------------|----------------|--------------|------------|--------|----------------|-----------------------------|
|            | (see figure S1) |               | HIV-1 infection |                        |                |              |            |        |                |                             |
| 3          | 1               | off           | primary         | activated CD4+ T-cells | 32780714       | 32780734     | 20         | +      |                |                             |
| 3          | 1               | off           | primary         | activated CD4+ T-cells | 28211805       | 28211890     | 14         | -      |                |                             |
| 3          | 1               | off           | primary         | activated CD4+ T-cells | 175895534      | 175895680    | 1          | +      |                |                             |
| 3          | 1               | off           | primary         | activated CD4+ T-cells | 73965527       | 73965623     | 17         | +      | ACOX1          | convergent                  |
| 3          | 1               | off           | primary         | activated CD4+ T-cells | 15738342       | 15738452     | 3          | +      | ANKRD28        | convergent                  |
| 3          | 1               | off           | primary         | activated CD4+ T-cells | 72812061       | 72812138     | 15         | -      | ARIH1          | convergent                  |
| 3          | 1               | off           | primary         | activated CD4+ T-cells | 48974355       | 48974457     | 3          | -      | ARIH2          | convergent                  |
| 3          | 1               | off           | primary         | activated CD4+ T-cells | 48962158       | 48962248     | 3          | +      | ARIH2          | same                        |
| 3          | 1               | off           | primary         | resting CD4+ T-cells   | 52534214       | 52534383     | 1          | +      | BTF3L4         | same                        |
| 3          | 1               | off           | primary         | activated CD4+ T-cells | 68035394       | 68035515     | 11         | +      | C11orf24       | convergent                  |
| 3          | 1               | off           | primary         | activated CD4+ T-cells | 191075979      | 191076038    | 3          | -      | CCDC50         | convergent                  |
| 3          | 1               | off           | primary         | activated CD4+ T-cells | 28429906       | 28429986     | 12         | -      | CCDC91         | convergent                  |
| 3          | 1               | off           | primary         | activated CD4+ T-cells | 49094753       | 49094910     | 12         | -      | CCNT1          | same                        |
| 3          | 1               | off           | primary         | activated CD4+ T-cells | 42063028       | 42063167     | 19         | +      | CEACAM21       | same                        |
| 3          | 1               | off           | primary         | activated CD4+ T-cells | 74095068       | 74095166     | 17         | +      | EXOC7          | convergent                  |
| 3          | 1               | off           | primary         | activated CD4+ T-cells | 80546882       | 80546940     | 17         | -      | FOKK2          | convergent                  |
| 3          | 1               | off           | primary         | resting CD4+ T-cells   | 151154346      | 151154519    | 5          | +      | G3BP1          | same                        |
| 3          | 1               | off           | primary         | activated CD4+ T-cells | 76584940       | 76584971     | 4          | +      | G3BP2          | convergent                  |
| 3          | 1               | off           | primary         | activated CD4+ T-cells | 27009915       | 27009935     | 9          | +      | IFT74          | same                        |
| 3          | 1               | off           | primary         | resting CD4+ T-cells   | 226859936      | 226860090    | 1          | +      | ITPKBITPKB-IT1 | convergent                  |
| 3          | 1               | off           | primary         | activated CD4+ T-cells | 44279218       | 44279399     | 17         | +      | KANSL1         | convergent                  |
| 3          | 1               | off           | primary         | resting CD4+ T-cells   | 44246676       | 44246702     | 17         | -      | KANSL1         | same                        |
| 3          | 1               | off           | primary         | resting CD4+ T-cells   | 76218545       | 76218580     | 7          | -      | LOC100133091   | convergent                  |
| 3          | 1               | off           | primary         | resting CD4+ T-cells   | 160795172      | 160795321    | 1          | +      | LY9            | same                        |
| 3          | 1               | off           | primary         | resting CD4+ T-cells   | 30528476       | 30528615     | 21         | -      | MAP3K7CL       | convergent                  |
| 3          | 1               | off           | primary         | resting CD4+ T-cells   | 116576124      | 116576191    | 12         | +      | MED13L         | convergent                  |
| 3          | 1               | off           | primary         | activated CD4+ T-cells | 40852877       | 40853021     | 22         | -      | MKL1           | same                        |
| 3          | 1               | off           | primary         | activated CD4+ T-cells | 145231086      | 145231155    | 8          | -      | MROH1          | convergent                  |
| 3          | 1               | off           | primary         | activated CD4+ T-cells | 45012322       | 45012438     | 7          | +      | MYO1G          | convergent                  |
| 3          | 1               | off           | primary         | activated CD4+ T-cells | 17844818       | 17844872     | 8          | -      | PCM1           | convergent                  |
| 3          | 1               | off           | primary         | activated CD4+ T-cells | 197728691      | 197728711    | 2          | -      | PGAP1          | same                        |
| 3          | 1               | off           | primary         | activated CD4+ T-cells | 50813736       | 50813790     | 22         | +      | PPP6R2         | same                        |
| 3          | 1               | off           | primary         | activated CD4+ T-cells | 123290747      | 123290813    | 3          | -      | PTPLB          | same                        |
| 3          | 1               | off           | primary         | activated CD4+ T-cells | 391125         | 391200       | 20         | -      | RBCK1          | convergent                  |
| 3          | 1               | off           | primary         | activated CD4+ T-cells | 35625765       | 35625845     | 20         | +      | RBL1           | convergent                  |
| 3          | 1               | off           | primary         | activated CD4+ T-cells | 133961481      | 133961555    | 5          | -      | SAR1B          | same                        |

| patient ID | time point      | ART<br>(on, off) | stage of           | cell type              | amplicon<br>start | amplicon<br>end | chromosome | strand | refGene name | transcriptional<br>orientation |
|------------|-----------------|------------------|--------------------|------------------------|-------------------|-----------------|------------|--------|--------------|--------------------------------|
|            | (see figure S1) |                  | HIV-1<br>infection |                        |                   |                 |            |        |              |                                |
| 3          | 1               | off              | primary            | activated CD4+ T-cells | 35256437          | 35256567        | 20         | -      | SLA2         | same                           |
| 3          | 1               | off              | primary            | activated CD4+ T-cells | 33743524          | 33743587        | 17         | +      | SLFN12       | convergent                     |
| 3          | 1               | off              | primary            | activated CD4+ T-cells | 53429024          | 53429173        | X          | +      | SMC1A        | convergent                     |
| 3          | 1               | off              | primary            | activated CD4+ T-cells | 231290829         | 231290864       | 2          | +      | SP100        | same                           |
| 3          | 1               | off              | primary            | activated CD4+ T-cells | 16231018          | 16231109        | 1          | +      | SPEN         | same                           |
| 3          | 1               | off              | primary            | activated CD4+ T-cells | 22425216          | 22425238        | 12         | -      | ST8SIA1      | same                           |
| 3          | 1               | off              | primary            | activated CD4+ T-cells | 17741832          | 17741910        | 10         | +      | STAM         | same                           |
| 3          | 1               | off              | primary            | activated CD4+ T-cells | 105135414         | 105135525       | 10         | -      | TAF5         | convergent                     |
| 3          | 1               | off              | primary            | activated CD4+ T-cells | 118785499         | 118785634       | 12         | +      | TAOK3        | convergent                     |
| 3          | 1               | off              | primary            | activated CD4+ T-cells | 21008446          | 21008596        | 18         | -      | TMEM241      | same                           |
| 3          | 1               | off              | primary            | activated CD4+ T-cells | 49721180          | 49721232        | 12         | -      | TROAP        | convergent                     |
| 3          | 1               | off              | primary            | activated CD4+ T-cells | 76254246          | 76254335        | 14         | +      | TLL5         | same                           |
| 3          | 1               | off              | primary            | resting CD4+ T-cells   | 10483425          | 10483535        | 19         | +      | TYK2         | convergent                     |
| 3          | 1               | off              | primary            | activated CD4+ T-cells | 44525278          | 44525343        | 21         | -      | U2AF1        | same                           |
| 3          | 1               | off              | primary            | activated CD4+ T-cells | 33226872          | 33227049        | 6          | +      | VPS52        | convergent                     |
| 3          | 1               | off              | primary            | activated CD4+ T-cells | 38210469          | 38210634        | 8          | -      | WHSC1L1      | same                           |
| 3          | 1               | off              | primary            | activated CD4+ T-cells | 15534310          | 15534483        | 19         | -      | WIZ          | same                           |
| 3          | 1               | off              | primary            | resting CD4+ T-cells   | 28186778          | 28186896        | 16         | -      | XPO6         | same                           |
| 3          | 1               | off              | primary            | resting CD4+ T-cells   | 37869513          | 37869637        | 19         | +      | ZNF527       | same                           |
| 3          | 2               | on               | chronic            | resting CD4+ T-cells   | 67929947          | 67930064        | 15         | +      | MAP2K5       | same                           |
| 3          | 2               | on               | chronic            | resting CD4+ T-cells   | 767365            | 767401          | 12         | +      | NINJ2        | convergent                     |
| 3          | 2               | on               | chronic            | activated CD4+ T-cells | 55177824          | 55177878        | 14         | -      | SAMD4A       | convergent                     |
| 3          | 4               | off              | chronic            | resting CD4+ T-cells   | 45533167          | 45533228        | 13         | -      | NUFIP1       | same                           |
| 3          | 5               | off              | chronic            | resting CD4+ T-cells   | 34335351          | 34335371        | 10         | +      |              |                                |
| 3          | 5               | off              | chronic            | resting CD4+ T-cells   | 38827502          | 38827522        | 22         | -      | KCNJ4        | same                           |
| 3          | 5               | off              | chronic            | resting CD4+ T-cells   | 90403411          | 90403497        | 6          | +      | MDN1         | convergent                     |
| 3          | 5               | off              | chronic            | resting CD4+ T-cells   | 129922913         | 129922936       | 9          | -      | RALGPS1      | convergent                     |
| 3          | 5               | off              | chronic            | resting CD4+ T-cells   | 150098216         | 150098299       | 1          | +      | VPS45        | same                           |
| 3          | 6               | off              | chronic            | resting CD4+ T-cells   | 34076             | 34136           | 18         | +      |              |                                |
| 3          | 6               | off              | chronic            | resting CD4+ T-cells   | 124399056         | 124399197       | 8          | +      | ATAD2        | convergent                     |
| 3          | 6               | off              | chronic            | resting CD4+ T-cells   | 80965509          | 80965675        | 17         | +      | B3GNTL1      | convergent                     |
| 3          | 6               | off              | chronic            | resting CD4+ T-cells   | 95134249          | 95134319        | 9          | +      | CENPP        | same                           |
| 3          | 6               | off              | chronic            | resting CD4+ T-cells   | 33039512          | 33039553        | 20         | -      | ITCH         | convergent                     |
| 3          | 6               | off              | chronic            | resting CD4+ T-cells   | 40536022          | 40536182        | X          | +      | MED14        | convergent                     |
| 3          | 6               | off              | chronic            | resting CD4+ T-cells   | 14308431          | 14308470        | 16         | +      | MKL2         | same                           |
| 3          | 6               | off              | chronic            | resting CD4+ T-cells   | 47064430          | 47064476        | 3          | +      | SETD2        | convergent                     |

| patient ID | time point         | ART<br>(on, off) | stage of           | cell type              | amplicon<br>start | amplicon<br>end | chromosome | strand | refGene name | transcriptional<br>orientation |
|------------|--------------------|------------------|--------------------|------------------------|-------------------|-----------------|------------|--------|--------------|--------------------------------|
|            | (see figure<br>S1) |                  | HIV-1<br>infection |                        |                   |                 |            |        |              |                                |
| 3          | 6                  | off              | chronic            | resting CD4+ T-cells   | 158257812         | 158258048       | 6          | -      | SNX9         | convergent                     |
| 3          | 6                  | off              | chronic            | resting CD4+ T-cells   | 30713493          | 30713754        | 22         | +      | TBC1D10A     | convergent                     |
| 3          | 6                  | off              | chronic            | resting CD4+ T-cells   | 146010644         | 146010871       | 8          | +      | ZNF34        | convergent                     |
| 3          | 6                  | off              | chronic            | resting CD4+ T-cells   | 146031901         | 146032039       | 8          | -      | ZNF517       | convergent                     |
| 4          | 1                  | off              | primary            | resting CD4+ T-cells   | 42658389          | 42658503        | 22         | -      |              |                                |
| 4          | 1                  | off              | primary            | resting CD4+ T-cells   | 170556588         | 170556615       | 4          | +      | CLCN3        | same                           |
| 4          | 1                  | off              | primary            | resting CD4+ T-cells   | 62189611          | 62189780        | 14         | +      | HIF1A        | same                           |
| 4          | 1                  | off              | primary            | resting CD4+ T-cells   | 44321265          | 44321290        | 21         | +      | NDUFV3       | same                           |
| 4          | 1                  | off              | primary            | resting CD4+ T-cells   | 29562947          | 29563134        | 17         | +      | NF1          | same                           |
| 4          | 1                  | off              | primary            | resting CD4+ T-cells   | 86571934          | 86572203        | 5          | -      | RASA1        | convergent                     |
| 4          | 3                  | off              | chronic            | resting CD4+ T-cells   | 17232750          | 17232864        | 1          | +      |              |                                |
| 4          | 3                  | off              | chronic            | resting CD4+ T-cells   | 57736666          | 57736784        | 17         | -      | CLTC         | convergent                     |
| 4          | 3                  | off              | chronic            | activated CD4+ T-cells | 91527729          | 91527849        | 15         | +      | PRC1PRC1-AS1 | both                           |
| 4          | 3                  | off              | chronic            | resting CD4+ T-cells   | 46736473          | 46736690        | 1          | +      | RAD54L       | same                           |
| 4          | 3                  | off              | chronic            | resting CD4+ T-cells   | 76023402          | 76023552        | 7          | +      | SRCRB4D      | convergent                     |
| 4          | 4                  | off              | chronic            | resting CD4+ T-cells   | 4946766           | 4946863         | 17         | -      |              |                                |
| 4          | 4                  | off              | chronic            | resting CD4+ T-cells   | 90726120          | 90726169        | 6          | -      | BACH2        | same                           |
| 4          | 4                  | off              | chronic            | resting CD4+ T-cells   | 176606762         | 176606842       | 5          | -      | NSD1         | convergent                     |
| 4          | 5                  | off              | chronic            | activated CD4+ T-cells | 58571796          | 58571826        | 17         | +      | APPBP2       | convergent                     |
| 4          | 5                  | off              | chronic            | activated CD4+ T-cells | 2943585           | 2943610         | 18         | +      | LPIN2        | convergent                     |
| 4          | 6                  | on               | chronic            | resting CD4+ T-cells   | 137141951         | 137142029       | 2          | +      |              |                                |
| 4          | 6                  | on               | chronic            | resting CD4+ T-cells   | 89196910          | 89197088        | 16         | -      | ACSF3        | convergent                     |
| 4          | 6                  | on               | chronic            | resting CD4+ T-cells   | 46115540          | 46115659        | 1          | +      | GPBP1L1      | convergent                     |
| 4          | 6                  | on               | chronic            | resting CD4+ T-cells   | 79668700          | 79668748        | 17         | +      | HGS          | same                           |
| 4          | 6                  | on               | chronic            | resting CD4+ T-cells   | 48059769          | 48059865        | 21         | -      | PRMT2        | convergent                     |
| 5          | 1                  | off              | primary            | activated CD4+ T-cells | 9696626           | 9696724         | 1          | +      |              |                                |
| 5          | 1                  | off              | primary            | activated CD4+ T-cells | 54957438          | 54957622        | 19         | -      |              |                                |
| 5          | 1                  | off              | primary            | resting CD4+ T-cells   | 38940385          | 38940436        | 21         | +      |              |                                |
| 5          | 1                  | off              | primary            | activated CD4+ T-cells | 77213475          | 77213501        | 16         | -      |              |                                |
| 5          | 1                  | off              | primary            | activated CD4+ T-cells | 11691864          | 11692210        | 19         | +      |              |                                |
| 5          | 1                  | off              | primary            | activated CD4+ T-cells | 32656226          | 32656304        | 6          | -      |              |                                |
| 5          | 1                  | off              | primary            | activated CD4+ T-cells | 43124528          | 43124557        | 22         | -      |              |                                |
| 5          | 1                  | off              | primary            | resting CD4+ T-cells   | 86001250          | 86001311        | 15         | -      | AKAP13       | convergent                     |
| 5          | 1                  | off              | primary            | activated CD4+ T-cells | 2437979           | 2438010         | 3          | +      | CNTN4        | same                           |
| 5          | 1                  | off              | primary            | activated CD4+ T-cells | 106937905         | 106937931       | 7          | +      | COG5         | convergent                     |
| 5          | 1                  | off              | primary            | activated CD4+ T-cells | 155679283         | 155679587       | 1          | -      | DAP3         | convergent                     |

| patient ID | time point (see figure S1) | ART (on, off) | stage of HIV-1 infection | cell type              | amplicon start | amplicon end | chromosome | strand | refGene name | transcriptional orientation |
|------------|----------------------------|---------------|--------------------------|------------------------|----------------|--------------|------------|--------|--------------|-----------------------------|
| 5          | 1                          | off           | primary                  | resting CD4+ T-cells   | 10266356       | 10266405     | 19         | +      | DNMT1        | convergent                  |
| 5          | 1                          | off           | primary                  | activated CD4+ T-cells | 74481734       | 74481897     | 14         | +      | ENTPD5       | convergent                  |
| 5          | 1                          | off           | primary                  | activated CD4+ T-cells | 79126618       | 79126648     | 4          | +      | FRAS1        | same                        |
| 5          | 1                          | off           | primary                  | resting CD4+ T-cells   | 135057860      | 135057971    | 2          | -      | MGAT5        | convergent                  |
| 5          | 1                          | off           | primary                  | activated CD4+ T-cells | 40890707       | 40891071     | 22         | -      | MKL1         | same                        |
| 5          | 1                          | off           | primary                  | resting CD4+ T-cells   | 145281841      | 145281964    | 8          | -      | MROH1        | convergent                  |
| 5          | 1                          | off           | primary                  | resting CD4+ T-cells   | 106457633      | 106457664    | 2          | -      | NCK2         | convergent                  |
| 5          | 1                          | off           | primary                  | resting CD4+ T-cells   | 3196888        | 3197063      | 19         | -      | NCLN         | convergent                  |
| 5          | 1                          | off           | primary                  | resting CD4+ T-cells   | 101731965      | 101732005    | 8          | +      | PABPC1       | convergent                  |
| 5          | 1                          | off           | primary                  | resting CD4+ T-cells   | 2562467        | 2562567      | 17         | +      | PAFAH1B1     | same                        |
| 5          | 1                          | off           | primary                  | activated CD4+ T-cells | 66745660       | 66745715     | 8          | -      | PDE7A        | same                        |
| 5          | 1                          | off           | primary                  | activated CD4+ T-cells | 5942052        | 5942416      | 19         | +      | RANBP3       | convergent                  |
| 5          | 1                          | off           | primary                  | activated CD4+ T-cells | 50013800       | 50013921     | 3          | -      | RBM6         | convergent                  |
| 5          | 1                          | off           | primary                  | activated CD4+ T-cells | 3959770        | 3959959      | 20         | -      | RNF24        | same                        |
| 5          | 1                          | off           | primary                  | activated CD4+ T-cells | 77031776       | 77031896     | 15         | -      | SCAPER       | same                        |
| 5          | 1                          | off           | primary                  | resting CD4+ T-cells   | 2261068        | 2261126      | 17         | +      | SGSM2        | same                        |
| 5          | 2                          | on            | chronic                  | resting CD4+ T-cells   | 39194200       | 39194224     | 19         | -      | ACTN4        | convergent                  |
| 5          | 2                          | on            | chronic                  | resting CD4+ T-cells   | 18107716       | 18107856     | 22         | +      | ATP6V1E1     | convergent                  |
| 5          | 2                          | on            | chronic                  | resting CD4+ T-cells   | 86289626       | 86289689     | 2          | +      | POLR1A       | convergent                  |
| 5          | 2                          | on            | chronic                  | resting CD4+ T-cells   | 73438979       | 73439103     | 11         | +      | RAB6A        | convergent                  |
| 5          | 2                          | on            | chronic                  | resting CD4+ T-cells   | 155650463      | 155650632    | 1          | +      | YY1AP1       | convergent                  |
| 5          | 3                          | off           | chronic                  | resting CD4+ T-cells   | 38308430       | 38308465     | 17         | -      | CASC3        | convergent                  |
| 5          | 3                          | off           | chronic                  | resting CD4+ T-cells   | 50643203       | 50643328     | 13         | +      | DLEU2        | convergent                  |
| 5          | 3                          | off           | chronic                  | resting CD4+ T-cells   | 109138720      | 109138779    | 1          | +      | FAM102B      | same                        |
| 5          | 3                          | off           | chronic                  | resting CD4+ T-cells   | 47272581       | 47272750     | 16         | -      | ITFG1        | same                        |
| 5          | 3                          | off           | chronic                  | resting CD4+ T-cells   | 226902699      | 226902842    | 1          | +      | ITPKB        | convergent                  |
| 5          | 3                          | off           | chronic                  | resting CD4+ T-cells   | 14306885       | 14307116     | 16         | +      | MKL2         | same                        |
| 5          | 3                          | off           | chronic                  | resting CD4+ T-cells   | 106827804      | 106827869    | 12         | +      | POLR3B       | same                        |
| 5          | 3                          | off           | chronic                  | resting CD4+ T-cells   | 68974625       | 68974716     | 16         | -      | TANGO6       | convergent                  |
| 5          | 3                          | off           | chronic                  | resting CD4+ T-cells   | 21418858       | 21418878     | 13         | +      | XPO4         | convergent                  |
| 5          | 4                          | off           | chronic                  | activated CD4+ T-cells | 34745111       | 34745173     | 6          | +      |              |                             |
| 5          | 4                          | off           | chronic                  | resting CD4+ T-cells   | 4011042        | 4011106      | 12         | +      |              |                             |
| 5          | 4                          | off           | chronic                  | resting CD4+ T-cells   | 14524168       | 14524278     | 12         | +      | ATF7IP       | same                        |
| 5          | 4                          | off           | chronic                  | resting CD4+ T-cells   | 73807165       | 73807321     | 11         | -      | C2CD3        | same                        |
| 5          | 4                          | off           | chronic                  | resting CD4+ T-cells   | 34474687       | 34474709     | 18         | -      | KIAA1328     | convergent                  |
| 5          | 4                          | off           | chronic                  | resting CD4+ T-cells   | 14308298       | 14308417     | 16         | +      | MKL2         | same                        |

| patient ID | time point         | ART<br>(on, off) | stage of           | cell type              | amplicon<br>start | amplicon<br>end | chromosome | strand | refGene name | transcriptional<br>orientation |
|------------|--------------------|------------------|--------------------|------------------------|-------------------|-----------------|------------|--------|--------------|--------------------------------|
|            | (see figure<br>S1) |                  | HIV-1<br>infection |                        |                   |                 |            |        |              |                                |
| 5          | 4                  | off              | chronic            | activated CD4+ T-cells | 4214698           | 4214786         | 17         | +      | UBE2G1       | convergent                     |
| 5          | 4                  | off              | chronic            | activated CD4+ T-cells | 146055771         | 146055912       | 8          | -      | ZNF7         | convergent                     |
| 5          | 5                  | off              | chronic            | activated CD4+ T-cells | 771544            | 771614          | 4          | +      |              |                                |
| 5          | 5                  | off              | chronic            | activated CD4+ T-cells | 74031232          | 74031302        | 10         | +      |              |                                |
| 5          | 5                  | off              | chronic            | activated CD4+ T-cells | 150344396         | 150344478       | 7          | -      |              |                                |
| 5          | 5                  | off              | chronic            | activated CD4+ T-cells | 130751061         | 130751186       | 9          | +      |              |                                |
| 5          | 5                  | off              | chronic            | activated CD4+ T-cells | 39895805          | 39895848        | 19         | -      |              |                                |
| 5          | 5                  | off              | chronic            | resting CD4+ T-cells   | 75992413          | 75992441        | 17         | +      |              |                                |
| 5          | 5                  | off              | chronic            | activated CD4+ T-cells | 83705332          | 83705461        | 15         | -      | BTBD1        | same                           |
| 5          | 5                  | off              | chronic            | resting CD4+ T-cells   | 50455106          | 50455136        | 14         | +      | C14orf182    | convergent                     |
| 5          | 5                  | off              | chronic            | activated CD4+ T-cells | 67675314          | 67675462        | 12         | -      | CAND1        | convergent                     |
| 5          | 5                  | off              | chronic            | activated CD4+ T-cells | 30198399          | 30198487        | 16         | -      | CORO1A       | convergent                     |
| 5          | 5                  | off              | chronic            | resting CD4+ T-cells   | 118635309         | 118635375       | 11         | +      | DDX6         | convergent                     |
| 5          | 5                  | off              | chronic            | activated CD4+ T-cells | 77956419          | 77956523        | 11         | +      | GAB2         | convergent                     |
| 5          | 5                  | off              | chronic            | activated CD4+ T-cells | 870052            | 870096          | 19         | -      | MED16        | same                           |
| 5          | 5                  | off              | chronic            | activated CD4+ T-cells | 14307806          | 14307976        | 16         | +      | MKL2         | same                           |
| 5          | 5                  | off              | chronic            | resting CD4+ T-cells   | 72123794          | 72123909        | 15         | +      | MYO9A        | convergent                     |
| 5          | 5                  | off              | chronic            | resting CD4+ T-cells   | 134067607         | 134067684       | 9          | +      | NUP214       | same                           |
| 5          | 5                  | off              | chronic            | resting CD4+ T-cells   | 68419657          | 68419769        | 15         | -      | PIAS1        | convergent                     |
| 5          | 5                  | off              | chronic            | activated CD4+ T-cells | 90079339          | 90079399        | 10         | +      | RNLS         | convergent                     |
| 5          | 5                  | off              | chronic            | activated CD4+ T-cells | 82367280          | 82367300        | 5          | -      | TMEM167A     | same                           |
| 5          | 5                  | off              | chronic            | activated CD4+ T-cells | 35061701          | 35061754        | 9          | +      | VCP          | convergent                     |
| 5          | 5                  | off              | chronic            | activated CD4+ T-cells | 110931382         | 110931479       | 12         | +      | VPS29        | convergent                     |
| 5          | 6                  | off              | chronic            | activated CD4+ T-cells | 39349258          | 39349347        | 19         | +      |              |                                |
| 5          | 6                  | off              | chronic            | resting CD4+ T-cells   | 7784544           | 7784573         | 17         | +      |              |                                |
| 5          | 6                  | off              | chronic            | activated CD4+ T-cells | 113295487         | 113295509       | 6          | +      |              |                                |
| 5          | 6                  | off              | chronic            | activated CD4+ T-cells | 5508809           | 5508829         | 4          | -      |              |                                |
| 5          | 6                  | off              | chronic            | activated CD4+ T-cells | 39281374          | 39281412        | 3          | +      |              |                                |
| 5          | 6                  | off              | chronic            | resting CD4+ T-cells   | 86730129          | 86730152        | 14         | -      |              |                                |
| 5          | 6                  | off              | chronic            | resting CD4+ T-cells   | 229456625         | 229456744       | 1          | +      |              |                                |
| 5          | 6                  | off              | chronic            | resting CD4+ T-cells   | 101701379         | 101701463       | 15         | -      |              |                                |
| 5          | 6                  | off              | chronic            | resting CD4+ T-cells   | 30472747          | 30472905        | 6          | +      |              |                                |
| 5          | 6                  | off              | chronic            | resting CD4+ T-cells   | 79627433          | 79627551        | 17         | -      |              |                                |
| 5          | 6                  | off              | chronic            | activated CD4+ T-cells | 7730472           | 7730561         | Y          | -      |              |                                |
| 5          | 6                  | off              | chronic            | resting CD4+ T-cells   | 15425406          | 15425494        | 19         | -      |              |                                |
| 5          | 6                  | off              | chronic            | resting CD4+ T-cells   | 57738351          | 57738425        | 12         | -      |              |                                |

| patient ID | time point         | ART<br>(on, off) | stage of           | cell type              | amplicon<br>start | amplicon<br>end | chromosome | strand | refGene name | transcriptional<br>orientation |
|------------|--------------------|------------------|--------------------|------------------------|-------------------|-----------------|------------|--------|--------------|--------------------------------|
|            | (see figure<br>S1) |                  | HIV-1<br>infection |                        |                   |                 |            |        |              |                                |
| 5          | 6                  | off              | chronic            | resting CD4+ T-cells   | 30480189          | 30480373        | 6          | -      |              |                                |
| 5          | 6                  | off              | chronic            | resting CD4+ T-cells   | 9137560           | 9137694         | 12         | -      |              |                                |
| 5          | 6                  | off              | chronic            | resting CD4+ T-cells   | 42358163          | 42358287        | 19         | +      |              |                                |
| 5          | 6                  | off              | chronic            | resting CD4+ T-cells   | 46084592          | 46084635        | 10         | +      | MARCH8       | convergent                     |
| 5          | 6                  | off              | chronic            | resting CD4+ T-cells   | 100146129         | 100146388       | 7          | +      | AGFG2        | same                           |
| 5          | 6                  | off              | chronic            | resting CD4+ T-cells   | 15523849          | 15524116        | 19         | +      | AKAP8L       | convergent                     |
| 5          | 6                  | off              | chronic            | resting CD4+ T-cells   | 46642918          | 46643006        | 11         | -      | ATG13        | convergent                     |
| 5          | 6                  | off              | chronic            | activated CD4+ T-cells | 70776125          | 70776172        | X          | -      | BCYRN1OGT    | both                           |
| 5          | 6                  | off              | chronic            | resting CD4+ T-cells   | 6919420           | 6919484         | 1          | +      | CAMTA1       | same                           |
| 5          | 6                  | off              | chronic            | resting CD4+ T-cells   | 201724343         | 201724384       | 2          | +      | CLK1         | convergent                     |
| 5          | 6                  | off              | chronic            | resting CD4+ T-cells   | 38783936          | 38784015        | 22         | +      | CSNK1E       | convergent                     |
| 5          | 6                  | off              | chronic            | resting CD4+ T-cells   | 76746419          | 76746525        | 17         | +      | CYTH1        | convergent                     |
| 5          | 6                  | off              | chronic            | resting CD4+ T-cells   | 61892884          | 61892949        | 17         | +      | DDX42        | same                           |
| 5          | 6                  | off              | chronic            | resting CD4+ T-cells   | 668377            | 668480          | 11         | -      | DEAF1        | same                           |
| 5          | 6                  | off              | chronic            | resting CD4+ T-cells   | 111914202         | 111914318       | 11         | -      | DLAT         | convergent                     |
| 5          | 6                  | off              | chronic            | resting CD4+ T-cells   | 32665217          | 32665403        | 7          | -      | DPY19L1P1    | same                           |
| 5          | 6                  | off              | chronic            | resting CD4+ T-cells   | 140516309         | 140516345       | 9          | +      | EHMT1        | same                           |
| 5          | 6                  | off              | chronic            | activated CD4+ T-cells | 55149915          | 55149936        | 2          | -      | EML6         | convergent                     |
| 5          | 6                  | off              | chronic            | resting CD4+ T-cells   | 65128566          | 65128721        | 17         | -      | HELZ         | same                           |
| 5          | 6                  | off              | chronic            | activated CD4+ T-cells | 1071898           | 1071992         | 19         | +      | HMHA1        | same                           |
| 5          | 6                  | off              | chronic            | resting CD4+ T-cells   | 1736262           | 1736408         | 16         | +      | HN1L         | same                           |
| 5          | 6                  | off              | chronic            | resting CD4+ T-cells   | 48740341          | 48740387        | 3          | -      | IP6K2        | same                           |
| 5          | 6                  | off              | chronic            | activated CD4+ T-cells | 48888698          | 48888911        | 19         | -      | KDELR1       | same                           |
| 5          | 6                  | off              | chronic            | resting CD4+ T-cells   | 118323440         | 118323666       | 11         | -      | KMT2A        | convergent                     |
| 5          | 6                  | off              | chronic            | resting CD4+ T-cells   | 49429529          | 49429592        | 12         | +      | KMT2D        | convergent                     |
| 5          | 6                  | off              | chronic            | resting CD4+ T-cells   | 45745208          | 45745347        | 17         | +      | KPNB1        | same                           |
| 5          | 6                  | off              | chronic            | resting CD4+ T-cells   | 2377270           | 2377379         | 17         | +      | METTL16      | convergent                     |
| 5          | 6                  | off              | chronic            | resting CD4+ T-cells   | 3514500           | 3514639         | 16         | +      | NAA60        | same                           |
| 5          | 6                  | off              | chronic            | resting CD4+ T-cells   | 15750781          | 15750833        | 16         | +      | NDE1         | same                           |
| 5          | 6                  | off              | chronic            | resting CD4+ T-cells   | 198241696         | 198241764       | 1          | +      | NEK7         | same                           |
| 5          | 6                  | off              | chronic            | resting CD4+ T-cells   | 69608392          | 69608444        | 16         | -      | NFAT5        | convergent                     |
| 5          | 6                  | off              | chronic            | activated CD4+ T-cells | 61716828          | 61716872        | 1          | +      | NFIANFIA-AS1 | same                           |
| 5          | 6                  | off              | chronic            | resting CD4+ T-cells   | 26519058          | 26519194        | 17         | +      | NLK          | same                           |
| 5          | 6                  | off              | chronic            | resting CD4+ T-cells   | 28816257          | 28816337        | 1          | -      | PHACTR4      | convergent                     |
| 5          | 6                  | off              | chronic            | activated CD4+ T-cells | 88786324          | 88786349        | 16         | +      | PIZO1        | convergent                     |
| 5          | 6                  | off              | chronic            | activated CD4+ T-cells | 159554            | 159609          | Y          | +      | PLCXD1       | same                           |

| patient ID | time point         | ART<br>(on, off) | stage of           | cell type              | amplicon<br>start | amplicon<br>end | chromosome | strand | refGene name | transcriptional<br>orientation |
|------------|--------------------|------------------|--------------------|------------------------|-------------------|-----------------|------------|--------|--------------|--------------------------------|
|            | (see figure<br>S1) |                  | HIV-1<br>infection |                        |                   |                 |            |        |              |                                |
| 5          | 6                  | off              | chronic            | resting CD4+ T-cells   | 68340823          | 68340870        | 11         | +      | PPP6R3       | same                           |
| 5          | 6                  | off              | chronic            | resting CD4+ T-cells   | 35681141          | 35681201        | 20         | +      | RBL1         | convergent                     |
| 5          | 6                  | off              | chronic            | resting CD4+ T-cells   | 50026254          | 50026320        | 3          | -      | RBM6         | convergent                     |
| 5          | 6                  | off              | chronic            | resting CD4+ T-cells   | 61113714          | 61113933        | 2          | -      | REL          | convergent                     |
| 5          | 6                  | off              | chronic            | resting CD4+ T-cells   | 34396610          | 34396771        | 13         | -      | RFC3         | convergent                     |
| 5          | 6                  | off              | chronic            | resting CD4+ T-cells   | 56579742          | 56579808        | 12         | +      | SMARCC2      | convergent                     |
| 5          | 6                  | off              | chronic            | activated CD4+ T-cells | 2063827           | 2063867         | 17         | -      | SMG6         | same                           |
| 5          | 6                  | off              | chronic            | resting CD4+ T-cells   | 44243232          | 44243383        | 1          | +      | ST3GAL3      | same                           |
| 5          | 6                  | off              | chronic            | resting CD4+ T-cells   | 229740010         | 229740339       | 1          | +      | TAF5L        | convergent                     |
| 5          | 6                  | off              | chronic            | resting CD4+ T-cells   | 5703783           | 5703933         | 11         | +      | TRIM5        | convergent                     |
| 5          | 6                  | off              | chronic            | resting CD4+ T-cells   | 28841951          | 28842036        | 10         | -      | WAC          | convergent                     |
| 5          | 6                  | off              | chronic            | resting CD4+ T-cells   | 19989017          | 19989039        | 19         | +      | ZNF253       | same                           |
| 5          | 6                  | off              | chronic            | resting CD4+ T-cells   | 133637300         | 133637326       | 12         | +      | ZNF84        | same                           |
| 6          | 1                  | off              | primary            | resting CD4+ T-cells   | 37403663          | 37403729        | 20         | +      |              |                                |
| 6          | 1                  | off              | primary            | resting CD4+ T-cells   | 67293303          | 67293427        | 9          | +      |              |                                |
| 6          | 1                  | off              | primary            | resting CD4+ T-cells   | 16447397          | 16447526        | 19         | +      |              |                                |
| 6          | 1                  | off              | primary            | resting CD4+ T-cells   | 234136879         | 234136930       | 2          | +      |              |                                |
| 6          | 1                  | off              | primary            | resting CD4+ T-cells   | 31327696          | 31327731        | 6          | -      |              |                                |
| 6          | 1                  | off              | primary            | resting CD4+ T-cells   | 66495212          | 66495396        | 5          | +      |              |                                |
| 6          | 1                  | off              | primary            | resting CD4+ T-cells   | 1057537           | 1057607         | 19         | -      | ABCA7        | convergent                     |
| 6          | 1                  | off              | primary            | activated CD4+ T-cells | 36472157          | 36472184        | 1          | -      | AGO3         | convergent                     |
| 6          | 1                  | off              | primary            | resting CD4+ T-cells   | 41562793          | 41562925        | X          | +      | CASK         | convergent                     |
| 6          | 1                  | off              | primary            | resting CD4+ T-cells   | 10094082          | 10094167        | 19         | +      | COL5A3       | convergent                     |
| 6          | 1                  | off              | primary            | resting CD4+ T-cells   | 62531309          | 62531482        | 20         | +      | DNAJC5       | same                           |
| 6          | 1                  | off              | primary            | resting CD4+ T-cells   | 37433581          | 37433618        | 7          | +      | ELMO1        | convergent                     |
| 6          | 1                  | off              | primary            | activated CD4+ T-cells | 42754485          | 42754646        | 19         | -      | ERF          | same                           |
| 6          | 1                  | off              | primary            | resting CD4+ T-cells   | 121563898         | 121564012       | 10         | -      | INPP5F       | convergent                     |
| 6          | 1                  | off              | primary            | resting CD4+ T-cells   | 39082792          | 39082836        | 19         | -      | MAP4K1       | same                           |
| 6          | 1                  | off              | primary            | resting CD4+ T-cells   | 123456703         | 123456772       | 9          | -      | MEGF9        | same                           |
| 6          | 1                  | off              | primary            | resting CD4+ T-cells   | 222814354         | 222814506       | 1          | -      | MIA3         | convergent                     |
| 6          | 1                  | off              | primary            | activated CD4+ T-cells | 30358219          | 30358318        | 22         | -      | MTMR3        | convergent                     |
| 6          | 1                  | off              | primary            | resting CD4+ T-cells   | 74325096          | 74325169        | 15         | -      | PML          | convergent                     |
| 6          | 1                  | off              | primary            | resting CD4+ T-cells   | 206755999         | 206756109       | 1          | +      | RASSF5       | same                           |
| 6          | 1                  | off              | primary            | resting CD4+ T-cells   | 18260043          | 18260166        | 17         | +      | SHMT1        | convergent                     |
| 6          | 1                  | off              | primary            | resting CD4+ T-cells   | 69298930          | 69299024        | 16         | -      | SNTB2        | convergent                     |
| 6          | 1                  | off              | primary            | resting CD4+ T-cells   | 50389769          | 50389843        | 19         | +      | TBC1D17      | same                           |



| patient ID | time point         | ART<br>(on, off) | stage of           | cell type              | amplicon<br>start | amplicon<br>end | chromosome | strand | refGene name     | transcriptional<br>orientation |
|------------|--------------------|------------------|--------------------|------------------------|-------------------|-----------------|------------|--------|------------------|--------------------------------|
|            | (see figure<br>S1) |                  | HIV-1<br>infection |                        |                   |                 |            |        |                  |                                |
| 6          | 1                  | off              | primary            | resting CD4+ T-cells   | 154230707         | 154230894       | 1          | +      | UBAP2L           | same                           |
| 6          | 1                  | off              | primary            | activated CD4+ T-cells | 131146858         | 131146907       | 9          | -      | URM1             | convergent                     |
| 6          | 1                  | off              | primary            | activated CD4+ T-cells | 942477            | 942662          | 12         | -      | WNK1             | convergent                     |
| 6          | 1                  | off              | primary            | resting CD4+ T-cells   | 22025645          | 22025706        | 19         | +      | ZNF43            | convergent                     |
| 6          | 2                  | off              | chronic            | activated CD4+ T-cells | 15435248          | 15435302        | 19         | +      |                  |                                |
| 6          | 2                  | off              | chronic            | activated CD4+ T-cells | 150569709         | 150569998       | 1          | -      |                  |                                |
| 6          | 2                  | off              | chronic            | activated CD4+ T-cells | 118595267         | 118595294       | 5          | +      |                  |                                |
| 6          | 2                  | off              | chronic            | resting CD4+ T-cells   | 68324069          | 68324134        | 18         | -      |                  |                                |
| 6          | 2                  | off              | chronic            | resting CD4+ T-cells   | 63791878          | 63791911        | 14         | -      |                  |                                |
| 6          | 2                  | off              | chronic            | resting CD4+ T-cells   | 35346764          | 35346952        | 19         | +      |                  |                                |
| 6          | 2                  | off              | chronic            | resting CD4+ T-cells   | 73089246          | 73089278        | X          | -      |                  |                                |
| 6          | 2                  | off              | chronic            | resting CD4+ T-cells   | 95852296          | 95852327        | 2          | +      |                  |                                |
| 6          | 2                  | off              | chronic            | activated CD4+ T-cells | 26280555          | 26280613        | 6          | +      |                  |                                |
| 6          | 2                  | off              | chronic            | resting CD4+ T-cells   | 57332448          | 57332481        | 16         | -      |                  |                                |
| 6          | 2                  | off              | chronic            | activated CD4+ T-cells | 16061770          | 16061883        | 16         | +      | ABCC1            | same                           |
| 6          | 2                  | off              | chronic            | resting CD4+ T-cells   | 39997725          | 39997793        | 12         | +      | ABCD2            | convergent                     |
| 6          | 2                  | off              | chronic            | activated CD4+ T-cells | 89195186          | 89195213        | 16         | -      | ACSF3            | convergent                     |
| 6          | 2                  | off              | chronic            | resting CD4+ T-cells   | 58775923          | 58776099        | 14         | +      | ARID4A           | same                           |
| 6          | 2                  | off              | chronic            | resting CD4+ T-cells   | 161899924         | 161899948       | 1          | +      | ATF6             | same                           |
| 6          | 2                  | off              | chronic            | resting CD4+ T-cells   | 160655984         | 160656087       | 1          | -      | CD48             | same                           |
| 6          | 2                  | off              | chronic            | activated CD4+ T-cells | 42067173          | 42067326        | 19         | +      | CEACAM21         | same                           |
| 6          | 2                  | off              | chronic            | activated CD4+ T-cells | 58604844          | 58605010        | 16         | +      | CNOT1            | convergent                     |
| 6          | 2                  | off              | chronic            | activated CD4+ T-cells | 4456241           | 4456427         | 16         | +      | CORO7-PAM16CORO7 | convergent                     |
| 6          | 2                  | off              | chronic            | activated CD4+ T-cells | 38787195          | 38787228        | 22         | +      | CSNK1E           | convergent                     |
| 6          | 2                  | off              | chronic            | resting CD4+ T-cells   | 50956897          | 50956995        | 12         | +      | DIP2B            | same                           |
| 6          | 2                  | off              | chronic            | activated CD4+ T-cells | 21316884          | 21316927        | 1          | -      | EIF4G3           | same                           |
| 6          | 2                  | off              | chronic            | activated CD4+ T-cells | 2679504           | 2679543         | 4          | -      | FAM193A          | convergent                     |
| 6          | 2                  | off              | chronic            | resting CD4+ T-cells   | 132716095         | 132716301       | 9          | -      | FNBP1            | same                           |
| 6          | 2                  | off              | chronic            | resting CD4+ T-cells   | 133374648         | 133374677       | 12         | +      | GOLGA3           | convergent                     |
| 6          | 2                  | off              | chronic            | resting CD4+ T-cells   | 156526460         | 156526493       | 5          | +      | HAVCR2           | convergent                     |
| 6          | 2                  | off              | chronic            | activated CD4+ T-cells | 112663649         | 112663725       | 12         | +      | HECTD4           | convergent                     |
| 6          | 2                  | off              | chronic            | activated CD4+ T-cells | 1737165           | 1737274         | 16         | +      | HN1L             | same                           |
| 6          | 2                  | off              | chronic            | activated CD4+ T-cells | 8520217           | 8520257         | 19         | +      | HNRNPM           | same                           |
| 6          | 2                  | off              | chronic            | resting CD4+ T-cells   | 30529935          | 30529999        | 22         | +      | HORMAD2          | same                           |
| 6          | 2                  | off              | chronic            | resting CD4+ T-cells   | 123027775         | 123027881       | 12         | +      | KNTC1            | same                           |
| 6          | 2                  | off              | chronic            | activated CD4+ T-cells | 45744115          | 45744299        | 17         | -      | KPNB1            | convergent                     |

| patient ID | time point         | ART<br>(on, off) | stage of           | cell type              | amplicon<br>start | amplicon<br>end | chromosome | strand | refGene name | transcriptional<br>orientation |
|------------|--------------------|------------------|--------------------|------------------------|-------------------|-----------------|------------|--------|--------------|--------------------------------|
|            | (see figure<br>S1) |                  | HIV-1<br>infection |                        |                   |                 |            |        |              |                                |
| 6          | 2                  | off              | chronic            | resting CD4+ T-cells   | 112633851         | 112633879       | 13         | -      | LINC00403    | convergent                     |
| 6          | 2                  | off              | chronic            | resting CD4+ T-cells   | 23112210          | 23112270        | 20         | +      | LINC00656    | convergent                     |
| 6          | 2                  | off              | chronic            | activated CD4+ T-cells | 117948441         | 117948597       | 1          | -      | MAN1A2       | convergent                     |
| 6          | 2                  | off              | chronic            | resting CD4+ T-cells   | 138654775         | 138654827       | 5          | -      | MATR3        | convergent                     |
| 6          | 2                  | off              | chronic            | resting CD4+ T-cells   | 65798930          | 65798962        | 12         | +      | MSRB3        | same                           |
| 6          | 2                  | off              | chronic            | activated CD4+ T-cells | 111974525         | 111974608       | 10         | -      | MXI1         | convergent                     |
| 6          | 2                  | off              | chronic            | activated CD4+ T-cells | 145429698         | 145429833       | 1          | -      | NBPF20NBPF10 | convergent                     |
| 6          | 2                  | off              | chronic            | activated CD4+ T-cells | 9773053           | 9773112         | 1          | +      | PIK3CD       | same                           |
| 6          | 2                  | off              | chronic            | resting CD4+ T-cells   | 62652461          | 62652506        | 20         | -      | PRPF6        | convergent                     |
| 6          | 2                  | off              | chronic            | activated CD4+ T-cells | 50106529          | 50106581        | 19         | -      | PRR12        | convergent                     |
| 6          | 2                  | off              | chronic            | activated CD4+ T-cells | 74162733          | 74162830        | 17         | -      | RNF157       | same                           |
| 6          | 2                  | off              | chronic            | activated CD4+ T-cells | 78569428          | 78569723        | 17         | +      | RPTOR        | same                           |
| 6          | 2                  | off              | chronic            | activated CD4+ T-cells | 9452786           | 9452863         | 3          | +      | SETD5        | same                           |
| 6          | 2                  | off              | chronic            | activated CD4+ T-cells | 31924054          | 31924125        | 22         | +      | SFI1         | same                           |
| 6          | 2                  | off              | chronic            | resting CD4+ T-cells   | 59022640          | 59022677        | 19         | +      | SLC27A5      | convergent                     |
| 6          | 2                  | off              | chronic            | resting CD4+ T-cells   | 30737932          | 30737998        | 16         | +      | SRCAP        | same                           |
| 6          | 2                  | off              | chronic            | activated CD4+ T-cells | 43663731          | 43663795        | 20         | +      | STK4         | same                           |
| 6          | 2                  | off              | chronic            | resting CD4+ T-cells   | 73129245          | 73129275        | 7          | -      | STX1A        | same                           |
| 6          | 2                  | off              | chronic            | activated CD4+ T-cells | 98418101          | 98418255        | 2          | +      | TMEM131      | convergent                     |
| 6          | 2                  | off              | chronic            | activated CD4+ T-cells | 54506896          | 54507033        | 1          | +      | TMEM59       | convergent                     |
| 6          | 2                  | off              | chronic            | activated CD4+ T-cells | 41838297          | 41838445        | 22         | +      | TOB2         | convergent                     |
| 6          | 2                  | off              | chronic            | activated CD4+ T-cells | 202263464         | 202263619       | 2          | -      | TRAK2        | same                           |
| 6          | 2                  | off              | chronic            | activated CD4+ T-cells | 42365261          | 42365419        | 6          | -      | TRERF1       | same                           |
| 6          | 2                  | off              | chronic            | activated CD4+ T-cells | 103368028         | 103368180       | 8          | +      | UBR5         | convergent                     |
| 6          | 2                  | off              | chronic            | activated CD4+ T-cells | 50270680          | 50270863        | 22         | -      | ZBED4        | convergent                     |
| 6          | 2                  | off              | chronic            | resting CD4+ T-cells   | 12206906          | 12207022        | 19         | -      | ZNF788       | convergent                     |
| 6          | 3                  | off              | chronic            | resting CD4+ T-cells   | 64939171          | 64939503        | 14         | -      | AKAP5;ZBTB25 | both                           |
| 6          | 3                  | off              | chronic            | resting CD4+ T-cells   | 155494807         | 155495025       | 1          | -      | ASH1L        | same                           |
| 6          | 3                  | off              | chronic            | resting CD4+ T-cells   | 48227331          | 48227585        | 3          | +      | CDC25A       | convergent                     |
| 6          | 3                  | off              | chronic            | resting CD4+ T-cells   | 22394713          | 22395004        | 1          | +      | CDC42        | same                           |
| 6          | 3                  | off              | chronic            | resting CD4+ T-cells   | 3919845           | 3920200         | 16         | -      | CREBBP       | same                           |
| 6          | 3                  | off              | chronic            | resting CD4+ T-cells   | 159623171         | 159623258       | 4          | -      | ETFDH        | convergent                     |
| 6          | 3                  | off              | chronic            | resting CD4+ T-cells   | 36217317          | 36217375        | 19         | +      | KMT2B        | same                           |
| 6          | 3                  | off              | chronic            | resting CD4+ T-cells   | 77081441          | 77081586        | 15         | -      | SCAPER       | same                           |
| 6          | 3                  | off              | chronic            | resting CD4+ T-cells   | 50521093          | 50521251        | 19         | +      | VRK3         | convergent                     |
| 6          | 3                  | off              | chronic            | resting CD4+ T-cells   | 88662422          | 88662680        | 16         | +      | ZC3H18       | same                           |

| patient ID | time point (see figure S1) | ART (on, off) | stage of HIV-1 infection | cell type              | amplicon start | amplicon end | chromosome | strand | refGene name | transcriptional orientation |
|------------|----------------------------|---------------|--------------------------|------------------------|----------------|--------------|------------|--------|--------------|-----------------------------|
| 6          | 4                          | on            | chronic                  | resting CD4+ T-cells   | 98467989       | 98468218     | 14         | -      |              |                             |
| 6          | 4                          | on            | chronic                  | activated CD4+ T-cells | 79835286       | 79835332     | 17         | -      |              |                             |
| 6          | 4                          | on            | chronic                  | activated CD4+ T-cells | 182174504      | 182174550    | 4          | +      |              |                             |
| 6          | 4                          | on            | chronic                  | activated CD4+ T-cells | 195039510      | 195039592    | 3          | -      | ACAP2        | same                        |
| 6          | 4                          | on            | chronic                  | activated CD4+ T-cells | 159032708      | 159032885    | 1          | +      | AIM2         | convergent                  |
| 6          | 4                          | on            | chronic                  | resting CD4+ T-cells   | 90730779       | 90730813     | 6          | -      | BACH2        | same                        |
| 6          | 4                          | on            | chronic                  | resting CD4+ T-cells   | 90761344       | 90761459     | 6          | -      | BACH2        | same                        |
| 6          | 4                          | on            | chronic                  | resting CD4+ T-cells   | 68393532       | 68393654     | 4          | -      | CENPC        | same                        |
| 6          | 4                          | on            | chronic                  | activated CD4+ T-cells | 61028345       | 61028391     | 3          | +      | FHIT         | convergent                  |
| 6          | 4                          | on            | chronic                  | resting CD4+ T-cells   | 135351197      | 135351331    | 6          | +      | HBS1L        | convergent                  |
| 6          | 4                          | on            | chronic                  | activated CD4+ T-cells | 104679443      | 104679532    | 7          | -      | KMT2E        | convergent                  |
| 6          | 4                          | on            | chronic                  | resting CD4+ T-cells   | 14251973       | 14251998     | 19         | -      | LOC100507373 | convergent                  |
| 6          | 4                          | on            | chronic                  | resting CD4+ T-cells   | 67475377       | 67475427     | 8          | +      | MYBL1        | convergent                  |
| 6          | 4                          | on            | chronic                  | activated CD4+ T-cells | 137205376      | 137205398    | 5          | -      | MYOT         | convergent                  |
| 6          | 4                          | on            | chronic                  | resting CD4+ T-cells   | 65896379       | 65896525     | 11         | -      | PACS1        | convergent                  |
| 6          | 4                          | on            | chronic                  | resting CD4+ T-cells   | 5359744        | 5359765      | 9          | +      | PLGRKT       | convergent                  |
| 6          | 4                          | on            | chronic                  | resting CD4+ T-cells   | 82569786       | 82569837     | 11         | -      | PRCP         | same                        |
| 6          | 4                          | on            | chronic                  | resting CD4+ T-cells   | 31535020       | 31535065     | 1          | +      | PUM1         | convergent                  |
| 6          | 4                          | on            | chronic                  | resting CD4+ T-cells   | 8713869        | 8714005      | 1          | +      | RERE         | convergent                  |
| 6          | 4                          | on            | chronic                  | activated CD4+ T-cells | 39848453       | 39848533     | 19         | -      | SAMD4B       | convergent                  |
| 6          | 4                          | on            | chronic                  | resting CD4+ T-cells   | 13578497       | 13578534     | 6          | +      | SIRT5        | same                        |
| 6          | 4                          | on            | chronic                  | resting CD4+ T-cells   | 47388171       | 47388323     | 17         | -      | ZNF652       | same                        |
| 6          | 5                          | on            | chronic                  | resting CD4+ T-cells   | 64928706       | 64928730     | 2          | -      |              |                             |
| 6          | 5                          | on            | chronic                  | resting CD4+ T-cells   | 3578098        | 3578213      | 16         | -      | CLUAP1       | convergent                  |
| 6          | 5                          | on            | chronic                  | resting CD4+ T-cells   | 53207931       | 53208118     | 6          | +      | ELOVL5       | convergent                  |
| 6          | 5                          | on            | chronic                  | resting CD4+ T-cells   | 59997164       | 59997364     | 17         | +      | INTS2        | convergent                  |
| 6          | 5                          | on            | chronic                  | resting CD4+ T-cells   | 5691277        | 5691381      | 9          | +      | KIAA1432     | same                        |
| 6          | 5                          | on            | chronic                  | resting CD4+ T-cells   | 153147746      | 153147791    | X          | -      | L1CAM        | same                        |
| 6          | 5                          | on            | chronic                  | resting CD4+ T-cells   | 96050897       | 96051090     | 11         | +      | MAML2        | convergent                  |
| 6          | 5                          | on            | chronic                  | resting CD4+ T-cells   | 99295954       | 99296045     | 2          | -      | MGAT4A       | same                        |
| 6          | 5                          | on            | chronic                  | resting CD4+ T-cells   | 78305016       | 78305150     | 17         | -      | RNF213       | convergent                  |
| 6          | 5                          | on            | chronic                  | resting CD4+ T-cells   | 50633000       | 50633054     | 22         | -      | TRABD        | convergent                  |
| 6          | 5                          | on            | chronic                  | resting CD4+ T-cells   | 43525919       | 43526037     | 20         | -      | YWHAB        | convergent                  |
| 6          | 5                          | on            | chronic                  | resting CD4+ T-cells   | 144542255      | 144542434    | 8          | -      | ZC3H3        | same                        |
| 6          | 5                          | on            | chronic                  | resting CD4+ T-cells   | 60206786       | 60206881     | 18         | -      | ZCCHC2       | convergent                  |
| 6          | 6                          | on            | chronic                  | activated CD4+ T-cells | 236056847      | 236056870    | 1          | -      |              |                             |

| patient ID | time point (see figure S1) | ART (on, off) | stage of HIV-1 infection | cell type              | amplicon start | amplicon end | chromosome | strand | refGene name | transcriptional orientation |
|------------|----------------------------|---------------|--------------------------|------------------------|----------------|--------------|------------|--------|--------------|-----------------------------|
| 6          | 6                          | on            | chronic                  | resting CD4+ T-cells   | 40314131       | 40314265     | 22         | +      | GRAP2        | same                        |
| 6          | 6                          | on            | chronic                  | activated CD4+ T-cells | 41775905       | 41775962     | 19         | -      | HNRNPUL1     | convergent                  |
| 6          | 6                          | on            | chronic                  | activated CD4+ T-cells | 150385266      | 150385416    | 1          | -      | RPRD2        | convergent                  |
| 7          | 3                          | off           | chronic                  | activated CD4+ T-cells | 77220333       | 77220353     | 6          | -      |              |                             |
| 7          | 3                          | off           | chronic                  | resting CD4+ T-cells   | 149820258      | 149820355    | 1          | -      |              |                             |
| 7          | 3                          | off           | chronic                  | activated CD4+ T-cells | 74182115       | 74182177     | 2          | +      | DGUOK        | same                        |
| 7          | 3                          | off           | chronic                  | activated CD4+ T-cells | 44162912       | 44162932     | X          | -      | EFHC2        | same                        |
| 7          | 3                          | off           | chronic                  | activated CD4+ T-cells | 29098104       | 29098295     | 16         | +      | RRN3P2       | same                        |
| 7          | 3                          | off           | chronic                  | resting CD4+ T-cells   | 45790233       | 45790295     | 2          | +      | SRBD1        | convergent                  |
| 7          | 3                          | off           | chronic                  | resting CD4+ T-cells   | 12699292       | 12699349     | 19         | -      | ZNF490       | same                        |
| 7          | 4                          | on            | chronic                  | resting CD4+ T-cells   | 30478720       | 30478747     | 6          | -      |              |                             |
| 7          | 4                          | on            | chronic                  | resting CD4+ T-cells   | 102206728      | 102206801    | 8          | -      |              |                             |
| 7          | 4                          | on            | chronic                  | resting CD4+ T-cells   | 84573726       | 84573756     | 4          | +      |              |                             |
| 7          | 4                          | on            | chronic                  | resting CD4+ T-cells   | 26136731       | 26136758     | 6          | +      |              |                             |
| 7          | 4                          | on            | chronic                  | resting CD4+ T-cells   | 122938937      | 122939066    | 12         | +      |              |                             |
| 7          | 4                          | on            | chronic                  | resting CD4+ T-cells   | 11816260       | 11816366     | 6          | +      |              |                             |
| 7          | 4                          | on            | chronic                  | resting CD4+ T-cells   | 29457229       | 29457302     | 16         | +      |              |                             |
| 7          | 4                          | on            | chronic                  | resting CD4+ T-cells   | 86207802       | 86207834     | 15         | -      | AKAP13       | convergent                  |
| 7          | 4                          | on            | chronic                  | resting CD4+ T-cells   | 97809435       | 97809520     | 2          | -      | ANKRD36      | convergent                  |
| 7          | 4                          | on            | chronic                  | resting CD4+ T-cells   | 54666007       | 54666097     | 12         | +      | CBX5         | convergent                  |
| 7          | 4                          | on            | chronic                  | resting CD4+ T-cells   | 56648326       | 56648380     | 3          | +      | CCDC66       | same                        |
| 7          | 4                          | on            | chronic                  | resting CD4+ T-cells   | 86215834       | 86215906     | 10         | +      | CCSER2       | same                        |
| 7          | 4                          | on            | chronic                  | resting CD4+ T-cells   | 204603138      | 204603344    | 2          | -      | CD28         | convergent                  |
| 7          | 4                          | on            | chronic                  | resting CD4+ T-cells   | 238318466      | 238318644    | 2          | +      | COL6A3       | convergent                  |
| 7          | 4                          | on            | chronic                  | resting CD4+ T-cells   | 14017780       | 14017845     | 17         | +      | COX10        | same                        |
| 7          | 4                          | on            | chronic                  | resting CD4+ T-cells   | 52961004       | 52961275     | 6          | -      | FBXO9        | convergent                  |
| 7          | 4                          | on            | chronic                  | resting CD4+ T-cells   | 89590864       | 89591098     | 1          | -      | GBP2         | same                        |
| 7          | 4                          | on            | chronic                  | resting CD4+ T-cells   | 1815193        | 1815340      | 1          | +      | GNB1         | convergent                  |
| 7          | 4                          | on            | chronic                  | resting CD4+ T-cells   | 44167456       | 44167507     | 17         | +      | KANSL1       | convergent                  |
| 7          | 4                          | on            | chronic                  | resting CD4+ T-cells   | 70392501       | 70392532     | 6          | +      | LMBRD1       | convergent                  |
| 7          | 4                          | on            | chronic                  | resting CD4+ T-cells   | 60065219       | 60065276     | 17         | -      | MED13        | same                        |
| 7          | 4                          | on            | chronic                  | resting CD4+ T-cells   | 36870123       | 36870194     | 17         | -      | MLLT6        | convergent                  |
| 7          | 4                          | on            | chronic                  | resting CD4+ T-cells   | 2634907        | 2635007      | 16         | +      | PDPK1        | same                        |
| 7          | 4                          | on            | chronic                  | activated CD4+ T-cells | 75249198       | 75249237     | 10         | -      | PPP3CB       | same                        |
| 7          | 4                          | on            | chronic                  | resting CD4+ T-cells   | 141308647      | 141308820    | 3          | -      | RASA2        | convergent                  |
| 7          | 4                          | on            | chronic                  | resting CD4+ T-cells   | 56942965       | 56943006     | 12         | +      | RBMS2        | same                        |

| patient ID | time point (see figure S1) |     | ART (on, off) | stage of HIV-1 infection | cell type | amplicon start | amplicon end | chromosome | strand              | refGene name | transcriptional orientation |
|------------|----------------------------|-----|---------------|--------------------------|-----------|----------------|--------------|------------|---------------------|--------------|-----------------------------|
|            |                            |     |               |                          |           |                |              |            |                     |              |                             |
| 7          | 4                          | on  | chronic       | resting CD4+ T-cells     | 49423712  | 49423823       | 3            | -          | RHOA                | same         |                             |
| 7          | 4                          | on  | chronic       | resting CD4+ T-cells     | 39367168  | 39367264       | 19           | -          | RINL                | same         |                             |
| 7          | 4                          | on  | chronic       | resting CD4+ T-cells     | 38510491  | 38510521       | 19           | -          | SIPA1L3             | convergent   |                             |
| 7          | 4                          | on  | chronic       | resting CD4+ T-cells     | 59203488  | 59203571       | 15           | +          | SLTM                | convergent   |                             |
| 7          | 4                          | on  | chronic       | resting CD4+ T-cells     | 131374191 | 131374384      | 9            | +          | SPTAN1              | same         |                             |
| 7          | 4                          | on  | chronic       | resting CD4+ T-cells     | 43592788  | 43592816       | 2            | +          | THADA               | convergent   |                             |
| 7          | 4                          | on  | chronic       | resting CD4+ T-cells     | 35318365  | 35318511       | 9            | +          | UNC13B              | same         |                             |
| 7          | 4                          | on  | chronic       | resting CD4+ T-cells     | 67558748  | 67558804       | 8            | +          | VCPIP1              | convergent   |                             |
| 7          | 1                          | off | primary       | resting CD4+ T-cells     | 123605318 | 123605403      | 12           | +          |                     |              |                             |
| 7          | 1                          | off | primary       | resting CD4+ T-cells     | 21400618  | 21400864       | 1            | +          | EIF4G3              | convergent   |                             |
| 7          | 1                          | off | primary       | resting CD4+ T-cells     | 154535953 | 154536028      | 4            | +          | KIAA0922            | same         |                             |
| 7          | 1                          | off | primary       | resting CD4+ T-cells     | 151828863 | 151828937      | 4            | -          | LRBA                | same         |                             |
| 7          | 1                          | off | primary       | resting CD4+ T-cells     | 99660699  | 99660870       | 3            | +          | MIR548GCMSS1FILIP1L | both         |                             |
| 7          | 2                          | off | chronic       | activated CD4+ T-cells   | 65955113  | 65955187       | 17           | -          | BPTF                | convergent   |                             |
| 7          | 2                          | off | chronic       | resting CD4+ T-cells     | 130627414 | 130627609      | 5            | -          | CDC42SE2            | convergent   |                             |
| 7          | 2                          | off | chronic       | resting CD4+ T-cells     | 42679787  | 42679871       | 1            | -          | FOXJ3               | same         |                             |
| 7          | 2                          | off | chronic       | resting CD4+ T-cells     | 14241287  | 14241352       | 16           | -          | MKL2                | convergent   |                             |
| 7          | 5                          | on  | chronic       | activated CD4+ T-cells   | 67687922  | 67688020       | 12           | +          | CAND1               | same         |                             |
| 7          | 5                          | on  | chronic       | activated CD4+ T-cells   | 73376233  | 73376301       | 17           | -          | GRB2                | same         |                             |
| 7          | 5                          | on  | chronic       | resting CD4+ T-cells     | 31574161  | 31574228       | 22           | -          | RNF185              | convergent   |                             |
| 7          | 5                          | on  | chronic       | activated CD4+ T-cells   | 92086214  | 92086247       | 9            | +          | SEMA4D              | convergent   |                             |
| 7          | 6                          | on  | chronic       | resting CD4+ T-cells     | 19727841  | 19727970       | 1            | -          | CAPZB               | same         |                             |
| 7          | 6                          | on  | chronic       | resting CD4+ T-cells     | 74247808  | 74248005       | 14           | +          | ELMSAN1             | convergent   |                             |
| 7          | 6                          | on  | chronic       | resting CD4+ T-cells     | 49783477  | 49783680       | 3            | +          | IP6K1               | convergent   |                             |
| 7          | 6                          | on  | chronic       | resting CD4+ T-cells     | 88811610  | 88811768       | 16           | +          | PIEZO1              | both         |                             |
| 7          | 6                          | on  | chronic       | resting CD4+ T-cells     | 42601657  | 42601924       | 22           | +          | TCF20               | convergent   |                             |
| 8          | 1                          | off | chronic       | resting CD4+ T-cells     | 42404706  | 42404745       | 19           | +          | ARHGEF1             | same         |                             |
| 8          | 1                          | off | chronic       | resting CD4+ T-cells     | 163137379 | 163137515      | 2            | +          | IFIH1               | convergent   |                             |
| 8          | 2                          | off | chronic       | resting CD4+ T-cells     | 21264484  | 21264677       | 14           | +          |                     |              |                             |
| 8          | 2                          | off | chronic       | resting CD4+ T-cells     | 42986314  | 42986472       | 2            | -          |                     |              |                             |
| 8          | 2                          | off | chronic       | resting CD4+ T-cells     | 89533792  | 89533856       | 16           | +          | ANKRD11             | convergent   |                             |
| 8          | 2                          | off | chronic       | resting CD4+ T-cells     | 35227269  | 35227296       | 11           | -          | CD44                | convergent   |                             |
| 8          | 2                          | off | chronic       | resting CD4+ T-cells     | 48459533  | 48459601       | 18           | -          | ME2                 | convergent   |                             |
| 8          | 2                          | off | chronic       | resting CD4+ T-cells     | 21769723  | 21769799       | 1            | -          | NBPF3               | convergent   |                             |
| 8          | 2                          | off | chronic       | resting CD4+ T-cells     | 21120652  | 21120786       | 18           | +          | NPC1                | convergent   |                             |
| 8          | 2                          | off | chronic       | resting CD4+ T-cells     | 62626030  | 62626133       | 20           | -          | PRPF6               | convergent   |                             |

| patient ID | time point (see figure S1) | ART (on, off) | stage of HIV-1 infection | cell type              | amplicon start | amplicon end | chromosome | strand | refGene name   | transcriptional orientation |
|------------|----------------------------|---------------|--------------------------|------------------------|----------------|--------------|------------|--------|----------------|-----------------------------|
| 8          | 2                          | off           | chronic                  | resting CD4+ T-cells   | 127975688      | 127975820    | 9          | +      | RABEPK         | same                        |
| 8          | 2                          | off           | chronic                  | resting CD4+ T-cells   | 5163255        | 5163313      | 7          | -      | ZNF890P        | same                        |
| 8          | 3                          | off           | chronic                  | activated CD4+ T-cells | 1948963        | 1949189      | 19         | -      | CSNK1G2        | convergent                  |
| 8          | 3                          | off           | chronic                  | resting CD4+ T-cells   | 10840711       | 10840852     | 19         | -      | DNM2           | convergent                  |
| 8          | 3                          | off           | chronic                  | resting CD4+ T-cells   | 242322382      | 242322550    | 2          | +      | FARP2          | same                        |
| 8          | 3                          | off           | chronic                  | resting CD4+ T-cells   | 30882459       | 30882673     | 20         | -      | KIF3B          | convergent                  |
| 8          | 3                          | off           | chronic                  | resting CD4+ T-cells   | 99043830       | 99043886     | 8          | +      | MATN2          | same                        |
| 8          | 3                          | off           | chronic                  | activated CD4+ T-cells | 65896602       | 65896680     | 11         | -      | PACS1          | convergent                  |
| 8          | 3                          | off           | chronic                  | activated CD4+ T-cells | 64035392       | 64035457     | 11         | -      | PLCB3          | convergent                  |
| 8          | 3                          | off           | chronic                  | activated CD4+ T-cells | 2096375        | 2096441      | 9          | +      | SMARCA2        | same                        |
| 8          | 3                          | off           | chronic                  | activated CD4+ T-cells | 172510856      | 172510925    | 1          | +      | SUCO           | same                        |
| 8          | 3                          | off           | chronic                  | activated CD4+ T-cells | 1637542        | 1637595      | 19         | +      | TCF3           | convergent                  |
| 8          | 3                          | off           | chronic                  | resting CD4+ T-cells   | 88575721       | 88575861     | 12         | +      | TMTC3          | same                        |
| 8          | 4                          | on            | chronic                  | resting CD4+ T-cells   | 153008132      | 153008228    | 4          | -      |                |                             |
| 8          | 4                          | on            | chronic                  | resting CD4+ T-cells   | 74060088       | 74060242     | 4          | +      | ANKRD17        | convergent                  |
| 8          | 4                          | on            | chronic                  | resting CD4+ T-cells   | 103142249      | 103142372    | 10         | +      | BTRC           | same                        |
| 8          | 4                          | on            | chronic                  | resting CD4+ T-cells   | 66409574       | 66409798     | 11         | +      | RBM14-RBM4RBM4 | same                        |
| 8          | 4                          | on            | chronic                  | resting CD4+ T-cells   | 35924617       | 35924668     | 17         | +      | SYNRG          | convergent                  |
| 8          | 4                          | on            | chronic                  | resting CD4+ T-cells   | 102840227      | 102840286    | 14         | +      | TECPR2         | same                        |
| 8          | 4                          | on            | chronic                  | resting CD4+ T-cells   | 32608042       | 32608100     | 21         | -      | TIAM1          | same                        |
| 8          | 5                          | on            | chronic                  | resting CD4+ T-cells   | 41335360       | 41335465     | 22         | -      |                |                             |
| 8          | 5                          | on            | chronic                  | resting CD4+ T-cells   | 92023120       | 92023329     | 9          | +      | SEMA4D         | convergent                  |
| 8          | 6                          | on            | chronic                  | resting CD4+ T-cells   | 148046432      | 148046452    | 2          | -      |                |                             |
| 8          | 6                          | on            | chronic                  | resting CD4+ T-cells   | 54386478       | 54386523     | 1          | +      |                |                             |
| 8          | 6                          | on            | chronic                  | resting CD4+ T-cells   | 75252015       | 75252035     | 2          | +      |                |                             |
| 8          | 6                          | on            | chronic                  | resting CD4+ T-cells   | 78071353       | 78071374     | 16         | +      |                |                             |
| 8          | 6                          | on            | chronic                  | resting CD4+ T-cells   | 126895284      | 126895304    | 12         | +      |                |                             |
| 8          | 6                          | on            | chronic                  | resting CD4+ T-cells   | 40233485       | 40233591     | 20         | -      | CHD6           | same                        |
| 8          | 6                          | on            | chronic                  | resting CD4+ T-cells   | 25667079       | 25667102     | 2          | -      | DTNB           | same                        |
| 8          | 6                          | on            | chronic                  | resting CD4+ T-cells   | 141258181      | 141258302    | 3          | -      | RASA2          | convergent                  |
| 8          | 6                          | on            | chronic                  | resting CD4+ T-cells   | 41824854       | 41824898     | 15         | -      | RPAP1          | same                        |
| 8          | 6                          | on            | chronic                  | activated CD4+ T-cells | 184650509      | 184650595    | 3          | -      | VPS8           | convergent                  |
| 8          | 6                          | on            | chronic                  | resting CD4+ T-cells   | 19923651       | 19923744     | 19         | +      | ZNF506         | convergent                  |
| 9          | 1                          | off           | primary                  | resting CD4+ T-cells   | 113307455      | 113307506    | 2          | -      | POLR1B         | convergent                  |
| 9          | 1                          | off           | primary                  | resting CD4+ T-cells   | 28177050       | 28177131     | 16         | -      | XPO6           | same                        |
| 9          |                            | on            | chronic                  | resting CD4+ T-cells   | 48057788       | 48057867     | 21         | -      | PRMT2          | convergent                  |

| patient ID | time point (see figure S1) | ART (on, off) | stage of HIV-1 infection | cell type              | amplicon start | amplicon end | chromosome | strand | refGene name | transcriptional orientation |
|------------|----------------------------|---------------|--------------------------|------------------------|----------------|--------------|------------|--------|--------------|-----------------------------|
|            |                            |               |                          |                        |                |              |            |        |              |                             |
| 9          |                            | on            | chronic                  | resting CD4+ T-cells   | 35951823       | 35951892     | 1          | +      | KIAA0319L    | convergent                  |
| 9          |                            | on            | chronic                  | resting CD4+ T-cells   | 47135588       | 47135642     | 16         | +      | NETO2        | convergent                  |
| 9          |                            | on            | chronic                  | resting CD4+ T-cells   | 65897620       | 65897733     | 11         | -      | PACS1        | convergent                  |
| 9          |                            | on            | chronic                  | resting CD4+ T-cells   | 100756167      | 100756208    | 13         | +      | PCCA         | same                        |
| 9          |                            | on            | chronic                  | resting CD4+ T-cells   | 123009331      | 123009442    | 12         | +      | RSRC2        | convergent                  |
| 10         | 1                          | off           | primary                  | resting CD4+ T-cells   | 8100427        | 8100568      | 17         | -      |              |                             |
| 10         | 1                          | off           | primary                  | resting CD4+ T-cells   | 215645138      | 215645158    | 1          | +      |              |                             |
| 10         | 1                          | off           | primary                  | resting CD4+ T-cells   | 6341402        | 6341426      | 19         | -      |              |                             |
| 10         | 1                          | off           | primary                  | activated CD4+ T-cells | 89506938       | 89507050     | 16         | +      | ANKRD11      | both                        |
| 10         | 1                          | off           | primary                  | resting CD4+ T-cells   | 203681362      | 203681483    | 1          | -      | ATP2B4       | convergent                  |
| 10         | 1                          | off           | primary                  | resting CD4+ T-cells   | 181623547      | 181623567    | 1          | +      | CACNA1E      | same                        |
| 10         | 1                          | off           | primary                  | resting CD4+ T-cells   | 41522198       | 41522219     | 22         | -      | EP300        | convergent                  |
| 10         | 1                          | off           | primary                  | resting CD4+ T-cells   | 27123140       | 27123213     | 17         | +      | FAM222B      | convergent                  |
| 10         | 1                          | off           | primary                  | resting CD4+ T-cells   | 99123904       | 99124070     | 7          | -      | ZKSCAN5      | convergent                  |
| 10         | 2                          | off           | chronic                  | activated CD4+ T-cells | 42492579       | 42492608     | 21         | -      |              |                             |
| 10         | 2                          | off           | chronic                  | resting CD4+ T-cells   | 95996078       | 95996099     | 13         | -      |              |                             |
| 10         | 2                          | off           | chronic                  | activated CD4+ T-cells | 2239374        | 2239433      | 19         | +      | SF3A2        | same                        |
| 10         | 3                          | off           | chronic                  | activated CD4+ T-cells | 47108573       | 47108706     | 21         | +      |              |                             |
| 10         | 3                          | off           | chronic                  | resting CD4+ T-cells   | 46095172       | 46095208     | 17         | -      |              |                             |
| 10         | 3                          | off           | chronic                  | resting CD4+ T-cells   | 18411168       | 18411281     | 19         | +      |              |                             |
| 10         | 3                          | off           | chronic                  | resting CD4+ T-cells   | 10356833       | 10356867     | 5          | +      | MARCH6       | same                        |
| 10         | 3                          | off           | chronic                  | resting CD4+ T-cells   | 90747238       | 90747271     | 6          | -      | BACH2        | same                        |
| 10         | 3                          | off           | chronic                  | resting CD4+ T-cells   | 62517653       | 62517697     | 17         | -      | CEP95        | convergent                  |
| 10         | 3                          | off           | chronic                  | activated CD4+ T-cells | 131096074      | 131096254    | 9          | -      | COQ4         | convergent                  |
| 10         | 3                          | off           | chronic                  | resting CD4+ T-cells   | 65997365       | 65997412     | 15         | -      | DENND4A      | same                        |
| 10         | 3                          | off           | chronic                  | resting CD4+ T-cells   | 80521561       | 80521595     | 17         | +      | FOKK2        | same                        |
| 10         | 3                          | off           | chronic                  | resting CD4+ T-cells   | 1741587        | 1741676      | 16         | -      | HN1L         | convergent                  |
| 10         | 3                          | off           | chronic                  | resting CD4+ T-cells   | 122529527      | 122529583    | 12         | -      | MLXIP        | convergent                  |
| 10         | 3                          | off           | chronic                  | resting CD4+ T-cells   | 112343442      | 112343469    | 10         | +      | SMC3         | same                        |
| 10         | 3                          | off           | chronic                  | resting CD4+ T-cells   | 49896706       | 49896788     | 12         | +      | SPATS2       | same                        |
| 10         | 3                          | off           | chronic                  | resting CD4+ T-cells   | 121312343      | 121312409    | 12         | -      | SPPL3        | same                        |
| 10         | 3                          | off           | chronic                  | activated CD4+ T-cells | 100562790      | 100563024    | 8          | +      | VPS13B       | same                        |
| 10         | 3                          | off           | chronic                  | resting CD4+ T-cells   | 50281362       | 50281408     | 22         | +      | ZBED4        | same                        |
| 10         | 3                          | off           | chronic                  | resting CD4+ T-cells   | 21936713       | 21936742     | 19         | +      | ZNF100       | convergent                  |
| 10         | 3                          | off           | chronic                  | resting CD4+ T-cells   | 32368928       | 32368989     | 20         | -      | ZNF341       | convergent                  |
| 10         | 3                          | off           | chronic                  | resting CD4+ T-cells   | 12038541       | 12038605     | 19         | -      | ZNF700       | convergent                  |

| patient ID | time point (see figure S1) | ART (on, off) | stage of HIV-1 infection | cell type            | amplicon start | amplicon end | chromosome | strand | refGene name   | transcriptional orientation |
|------------|----------------------------|---------------|--------------------------|----------------------|----------------|--------------|------------|--------|----------------|-----------------------------|
| 10         | 4                          | on            | chronic                  | resting CD4+ T-cells | 35792391       | 35792431     | 17         | -      | TADA2A         | convergent                  |
| 11         | 1                          | on            | late                     | PBMC                 | 68348789       | 68348907     | 18         | -      |                |                             |
| 11         | 1                          | on            | late                     | PBMC                 | 32891325       | 32891376     | 6          | +      |                |                             |
| 11         | 1                          | on            | late                     | PBMC                 | 29138342       | 29138371     | 16         | -      |                |                             |
| 11         | 1                          | on            | late                     | PBMC                 | 80138728       | 80138777     | 17         | -      | CCDC57         | same                        |
| 11         | 1                          | on            | late                     | PBMC                 | 111426450      | 111426503    | 1          | +      | CD53           | same                        |
| 11         | 1                          | on            | late                     | PBMC                 | 93508259       | 93508381     | 15         | -      | CHD2           | convergent                  |
| 11         | 1                          | on            | late                     | PBMC                 | 41513581       | 41513749     | 13         | +      | ELF1           | convergent                  |
| 11         | 1                          | on            | late                     | PBMC                 | 240239742      | 240239806    | 2          | +      | HDAC4          | convergent                  |
| 11         | 1                          | on            | late                     | PBMC                 | 57113362       | 57113456     | 12         | +      | NACA           | convergent                  |
| 11         | 1                          | on            | late                     | PBMC                 | 14783193       | 14783219     | 11         | -      | PDE3B          | convergent                  |
| 11         | 1                          | on            | late                     | PBMC                 | 120685093      | 120685157    | 12         | -      | PXN            | same                        |
| 11         | 1                          | on            | late                     | PBMC                 | 135188017      | 135188072    | 9          | +      | SETX           | convergent                  |
| 11         | 1                          | on            | late                     | PBMC                 | 107706360      | 107706484    | 11         | +      | SLC35F2        | convergent                  |
| 11         | 1                          | on            | late                     | PBMC                 | 47747307       | 47747377     | 17         | -      | SPOP           | same                        |
| 11         | 1                          | on            | late                     | PBMC                 | 116986121      | 116986152    | 6          | +      | ZUFSP          | convergent                  |
| 11         | 2                          | on            | late                     | PBMC                 | 34721036       | 34721090     | 19         | +      |                |                             |
| 11         | 2                          | on            | late                     | PBMC                 | 44265657       | 44265737     | 19         | +      |                |                             |
| 11         | 2                          | on            | late                     | PBMC                 | 45234693       | 45234732     | 1          | -      |                |                             |
| 11         | 2                          | on            | late                     | PBMC                 | 46853850       | 46853891     | 13         | +      |                |                             |
| 11         | 2                          | on            | late                     | PBMC                 | 4100848        | 4100895      | 17         | +      | ANKFY1         | convergent                  |
| 11         | 2                          | on            | late                     | PBMC                 | 76933371       | 76933540     | X          | +      | ATRX           | convergent                  |
| 11         | 2                          | on            | late                     | PBMC                 | 46107455       | 46107535     | 22         | -      | ATXN10         | convergent                  |
| 11         | 2                          | on            | late                     | PBMC                 | 367127         | 367155       | 16         | +      | AXIN1          | convergent                  |
| 11         | 2                          | on            | late                     | PBMC                 | 90871662       | 90871794     | 6          | +      | BACH2          | convergent                  |
| 11         | 2                          | on            | late                     | PBMC                 | 41926177       | 41926326     | 19         | -      | BCKDHA         | convergent                  |
| 11         | 2                          | on            | late                     | PBMC                 | 40524031       | 40524068     | 1          | -      | CAP1           | convergent                  |
| 11         | 2                          | on            | late                     | PBMC                 | 111426369      | 111426503    | 1          | +      | CD53           | same                        |
| 11         | 2                          | on            | late                     | PBMC                 | 1603156        | 1603265      | 1          | +      | CDK11BSLC35E2B | convergent                  |
| 11         | 2                          | on            | late                     | PBMC                 | 14035021       | 14035081     | 17         | +      | COX10          | same                        |
| 11         | 2                          | on            | late                     | PBMC                 | 76761883       | 76761985     | 17         | -      | CYTH1          | same                        |
| 11         | 2                          | on            | late                     | PBMC                 | 62542341       | 62542509     | 20         | +      | DNAJC5         | same                        |
| 11         | 2                          | on            | late                     | PBMC                 | 198404818      | 198404910    | 2          | -      | HSPE1-MOB4MOB4 | convergent                  |
| 11         | 2                          | on            | late                     | PBMC                 | 37040180       | 37040201     | 17         | -      | LASP1          | convergent                  |
| 11         | 2                          | on            | late                     | PBMC                 | 37040159       | 37040184     | 17         | +      | LASP1          | same                        |
| 11         | 2                          | on            | late                     | PBMC                 | 50825798       | 50825905     | 22         | +      | PPP6R2         | same                        |



| patient ID | time point (see figure S1) | ART (on, off) | stage of HIV-1 infection | cell type | amplicon start | amplicon end | chromosome | strand | refGene name | transcriptional orientation |
|------------|----------------------------|---------------|--------------------------|-----------|----------------|--------------|------------|--------|--------------|-----------------------------|
| 11         | 2                          | on            | late                     | PBMC      | 62629212       | 62629253     | 20         | -      | PRPF6        | convergent                  |
| 11         | 2                          | on            | late                     | PBMC      | 74234825       | 74234884     | 17         | -      | RNF157       | same                        |
| 11         | 2                          | on            | late                     | PBMC      | 131354363      | 131354510    | 9          | -      | SPTAN1       | convergent                  |
| 11         | 2                          | on            | late                     | PBMC      | 115596580      | 115596635    | 7          | +      | TFEC         | convergent                  |
| 11         | 2                          | on            | late                     | PBMC      | 110931344      | 110931500    | 12         | +      | VPS29        | convergent                  |
| 12         | 1                          | on            | late                     | PBMC      | 172467030      | 172467077    | 5          | +      |              |                             |
| 12         | 1                          | on            | late                     | PBMC      | 35217722       | 35217775     | 11         | +      | CD44         | same                        |
| 12         | 1                          | on            | late                     | PBMC      | 37669102       | 37669246     | 17         | -      | CDK12        | convergent                  |
| 12         | 1                          | on            | late                     | PBMC      | 173337955      | 173338057    | 5          | -      | CPEB4        | convergent                  |
| 12         | 1                          | on            | late                     | PBMC      | 10289458       | 10289627     | 19         | -      | DNMT1        | same                        |
| 12         | 1                          | on            | late                     | PBMC      | 61970384       | 61970480     | 14         | -      | PRKCH        | convergent                  |
| 12         | 1                          | on            | late                     | PBMC      | 2479772        | 2479934      | 4          | -      | RNF4         | convergent                  |
| 12         | 1                          | on            | late                     | PBMC      | 84758566       | 84758664     | 16         | -      | USP10        | convergent                  |
| 12         | 1                          | on            | late                     | PBMC      | 144609745      | 144609808    | 8          | +      | ZC3H3        | convergent                  |
| 12         | 1                          | on            | late                     | PBMC      | 44936238       | 44936258     | 19         | +      | ZNF229       | convergent                  |
| 12         | 2                          | on            | late                     | PBMC      | 114206381      | 114206465    | 3          | +      | ZBTB20       | convergent                  |
